1 **Cadherin-7 mediates proper neural crest cell-placodal neuron interactions during**  
2 **trigeminal ganglia assembly**

3

4

5 Chyong-Yi Wu and Lisa A. Taneyhill\*

6

7 Department of Animal and Avian Sciences, University of Maryland, College Park, MD  
8 20742, USA

9

10 \*Corresponding author

11 Address for manuscript correspondence:

12 e-mail: [ltaney@umd.edu](mailto:ltaney@umd.edu)

13 Tel: 301 405 0597

14 Fax: 301 405 7980

15

16 Grant number: NIH R01 DE024217

17 **ABSTRACT**

18 The cranial trigeminal ganglia play a vital role in the peripheral nervous system through  
19 their relay of sensory information from the vertebrate head to the brain. These ganglia  
20 are generated from the intermixing and coalescence of two distinct cell populations:  
21 cranial neural crest cells and placodal neurons. Trigeminal ganglia assembly requires  
22 the formation of cadherin-based adherens junctions within the neural crest cell and  
23 placodal neuron populations; however, the molecular composition of these adherens  
24 junctions is still unknown. Herein, we aimed to define the spatio-temporal expression  
25 pattern and function of Cadherin-7 during early chick trigeminal ganglia formation. Our  
26 data reveal that Cadherin-7 is expressed exclusively in migratory cranial neural crest  
27 cells and is absent from trigeminal neurons. Using molecular perturbation experiments,  
28 we demonstrate that modulation of Cadherin-7 in neural crest cells influences trigeminal  
29 ganglia assembly, including the organization of neural crest cells and placodal neurons  
30 within the ganglionic anlage. Moreover, alterations in Cadherin-7 levels lead to changes  
31 in the morphology of trigeminal neurons. Taken together, these findings provide  
32 additional insight into the role of cadherin-based adhesion in trigeminal ganglia  
33 formation, and, more broadly, the molecular mechanisms that orchestrate the cellular  
34 interactions essential for cranial gangliogenesis.

35

36 **KEYWORDS**

37 Trigeminal ganglia, neural crest, placodal neurons, Cadherin-7

38

## 39 INTRODUCTION

40 The cranial ganglia of the peripheral nervous system perform crucial sensory  
41 functions, including somatosensation and innervation of specific organs such as the  
42 heart and lungs. The trigeminal ganglion (cranial nerve V) is responsible for the former,  
43 mediating sensations of pain, touch, and temperature in the face and innervating the  
44 sensory apparatus of the muscles of the eye and upper and lower jaws. The collective  
45 intermixing and condensation of two embryonic cell populations, neural crest cells and  
46 neurogenic placode cells, is required to assemble the cranial ganglia (Breau and  
47 Schneider-Maunoury, 2015; Hamburger, 1961; Saint-Jeannet and Moody, 2014;  
48 Steventon et al., 2014). Neural crest cells arise from the dorsal region of the developing  
49 neural folds, undergo an epithelial-to-mesenchymal transition, and migrate to  
50 stereotypical destinations depending upon their axial level of origin and the molecular  
51 cues received from the extracellular environment (Bronner and Simoes-Costa, 2016;  
52 Duband et al., 2015; Gougnard et al., 2018; Simoes-Costa and Bronner, 2015;  
53 Taneyhill and Schiffmacher, 2017). Neurogenic placode cells originate as paired  
54 epidermal thickenings at distinct rostral-caudal positions in the vertebrate head. These  
55 cells delaminate from the surface ectoderm (and while doing so begin differentiating)  
56 and then migrate through the cranial mesenchyme, where they will eventually coalesce  
57 with neural crest cells to form the cranial ganglia (Baker and Bronner-Fraser, 2001;  
58 Jidigam and Gunhaga, 2013; Smith et al., 2015; Steventon et al., 2014). Prior studies  
59 have highlighted the reciprocal nature of neural crest cell-placodal neuron interactions,  
60 providing a working hypothesis in which neural crest cells act as a scaffold to integrate  
61 all of the placodal neurons such that one ganglion forms, while placodal neurons, in



62 turn, facilitate neural crest cell condensation (D'Amico-Martel and Noden, 1983;  
63 Hamburger, 1961; Shiau et al., 2008). The interactions between neural crest cells and  
64 placodal neurons are also highly dynamic, as these cells exhibit a “chase and run”  
65 behavior (Theveneau et al., 2013), with neural crest cells forming favorable pockets, or  
66 corridors, upon which placodal neurons prefer to migrate versus the less permissive  
67 mesoderm (Freter et al., 2013). As such, both transient and more stable intercellular  
68 interactions must occur between these two distinct cell types during their migration and  
69 coalescence to form a tightly adhered tissue.

70 Previous work has identified components of cadherin-based cellular adherens  
71 junctions, the levels of which must be tightly controlled to allow for proper intercellular  
72 interactions and gangliogenesis. In the chick, placodal neurons express N-cadherin, and  
73 signaling between Slit1, secreted by neural crest cells, and Robo2, the Slit1 receptor on  
74 the surface of placodal neurons, regulates N-cadherin levels, likely through a post-  
75 translational mechanism (Shiau et al., 2008; Shiau and Bronner-Fraser, 2009).  
76 Moreover, N-cadherin knockdown phenocopies depletion of Robo2, leading to more  
77 dispersed placodal neurons and, ultimately, defects in ganglion condensation (Shiau  
78 and Bronner-Fraser, 2009). The presence of *Cadherin-7* transcripts in the chick embryo  
79 was reported over 20 years ago using whole-mount *in situ* hybridization, which revealed  
80 *Cadherin-7* expression in early migrating cranial neural crest cells (Hamburger-Hamilton  
81 stage 10 (HH10)) as well as in the forming trigeminal ganglion (HH18) (Nakagawa and  
82 Takeichi, 1995). Long-term overexpression of Cadherin-7 in chick trunk neural crest  
83 cells was shown to only abrogate migration of neural crest cells along the dorsolateral  
84 pathway (taken by melanocyte precursors) but did not inhibit neural crest cell

85 differentiation (Nakagawa and Takeichi, 1998). The specific effect on melanocytes was  
86 ascribed to the timing at which the viral construct expressing Cadherin-7 achieved  
87 maximal levels (Nakagawa and Takeichi, 1998), and thus a functional role for Cadherin-  
88 7 in the neural crest was still not fully appreciated. More recent work revealed the  
89 presence of  $\alpha$ N-catenin in migratory cranial neural crest cells, with perturbations in  $\alpha$ N-  
90 catenin impacting trigeminal ganglia assembly, in part, through changes in the placodal  
91 neuron contribution to the ganglia and the level of Cadherin-7 in neural crest cells (Wu  
92 et al., 2014). No studies to date, however, have documented the spatio-temporal  
93 expression pattern of Cadherin-7 protein in chick migratory cranial neural crest cells  
94 during early gangliogenesis, nor investigated the role of Cadherin-7 in neural crest cells  
95 that form the trigeminal ganglia.

96         To this end, we have undertaken studies to define the distribution and function of  
97 Cadherin-7 in migratory neural crest cells during early chick trigeminal gangliogenesis.  
98 Our data show that Cadherin-7 is expressed solely in migratory cranial neural crest cells  
99 as the trigeminal ganglia form. To address Cadherin-7 function, we depleted and  
100 overexpressed Cadherin-7 in migratory neural crest cells and evaluated embryos for  
101 effects on trigeminal ganglia assembly. In each instance, we noted alterations in the  
102 distribution of neural crest cells and trigeminal neurons, along with abnormal trigeminal  
103 neuron morphology. Collectively, these results suggest that Cadherin-7 plays an  
104 important role in the migratory cranial neural crest cell population to permit correct  
105 trigeminal ganglia formation in the early chick embryo.

106

107 **RESULTS**

108 **Cadherin-7 is expressed in migratory cranial neural crest cells contributing to the**  
109 **trigeminal ganglia**

110 We documented the spatio-temporal expression pattern of Cadherin-7 protein  
111 throughout early stages of chick trigeminal gangliogenesis (HH12-HH17) using confocal  
112 microscopy. In keeping with a previously published report on *Cadherin-7* transcripts in  
113 the chick head (Nakagawa and Takeichi, 1995) and our prior study (Wu et al., 2014), we  
114 noted Cadherin-7 protein in migratory cranial neural crest cells (Fig. 1A-D) identified by  
115 labeling with an antibody to HNK-1 (Bronner-Fraser, 1986) (Fig. 1A'-D', arrows)  
116 throughout all stages examined (HH13-16 shown, identical results observed for HH12  
117 and HH17). Cadherin-7 is primarily observed on the plasma membrane of neural crest  
118 cells, co-localizing with the cell surface HNK-1 neural crest cell marker (Fig. 1A'-D',  
119 arrows). Moreover, Cadherin-7 protein is observed in the neural tube (Fig. 1A-D, \*). In  
120 contrast, Cadherin-7 is not detected in the trigeminal placode precursors residing in the  
121 surface ectoderm nor in trigeminal neurons, here labeled with Annexin A6 (Fig. 1A'-D',  
122 arrowheads), as only placodal neurons express Annexin A6 at these stages of  
123 development (Shah and Taneyhill, 2015). The cranial mesenchyme is devoid of  
124 Cadherin-7, as noted previously (Nakagawa and Takeichi, 1995). Thus, Cadherin-7 is  
125 expressed exclusively in migratory cranial neural crest cells throughout early trigeminal  
126 gangliogenesis.

127

128

129 **Reduced levels of Cadherin-7 alter trigeminal ganglia assembly through effects**  
130 **on neural crest cells and placodal neurons**

131 To assess the functional role of Cadherin-7 in neural crest cells contributing to  
132 the trigeminal ganglia, we performed morpholino (MO)-mediated knockdown of  
133 Cadherin-7 using a translation-blocking MO that targets the *Cadherin-7* 5' UTR and  
134 initial coding region (see Materials and Methods). As a control, we designed a five bp  
135 mismatch Cadherin-7 MO that does not block *Cadherin-7* translation. MO efficacy was  
136 confirmed by immunoblotting for Cadherin-7 protein in lysates prepared from  
137 electroporated, dissected trigeminal ganglia, as in (Shah et al., 2017), which resulted in  
138 an approximate 50% reduction in Cadherin-7 protein levels in tissue possessing the  
139 Cadherin-7 MO versus the control MO (Supp. Fig. 1, n = 2;).

140 We next determined whether knockdown of Cadherin-7 affects neural crest cells  
141 and placodal neurons contributing to the trigeminal ganglia. Premigratory cranial neural  
142 crest cells were unilaterally electroporated with the Cadherin-7 or control MO, and  
143 embryos were allowed to grow to HH15-HH16 followed by immunohistochemistry on  
144 cranial transverse sections using molecular markers to label neural crest cells (HNK-1)  
145 and placodal neurons (Tubb3), the latter of which only labels placode cell-derived  
146 neurons at this stage of development (Moody et al., 1989; Shiau et al., 2008), as neural  
147 crest cells differentiate much later (D'Amico-Martel and Noden, 1980; Steventon et al.,  
148 2014). Introduction of the control MO (Fig. 2A) into migratory neural crest cells did not  
149 affect the distribution of neural crest cells and trigeminal neurons, as assessed by HNK-  
150 1 (Fig. 2B) and Tubb3 (Fig. 2C) immunohistochemistry (n = 6 and n = 5 embryos,  
151 respectively), nor their ability to coalesce together (Fig. 2D, D', arrows and arrowheads).

152 Depletion of Cadherin-7 through introduction of the Cadherin-7 MO (Fig. 2E), however,  
153 impacted both the neural crest cell and trigeminal neuron populations in the ganglionic  
154 anlage. Neural crest cells did not organize correctly to form the typical morphology of  
155 the ganglion (Fig. 2F, H', arrows; n = 13/13 embryos; compare to Fig. 2B, D', arrows).  
156 Interestingly, trigeminal neurons were also affected, with these cells possessing fewer  
157 neuronal projections and thus appearing round instead of bipolar (Fig. 2G, H',  
158 arrowheads; n = 13/13 embryos) compared to the morphology adopted by trigeminal  
159 neurons in control MO-treated embryos (Fig. 2C, D', arrowheads). In addition, trigeminal  
160 neurons tended to aggregate together in small clusters or groups (Fig. 2G, H',  
161 arrowheads).

162 To rule out potential indirect effects on neural crest cells that could be causing  
163 these phenotypes during ganglia assembly, such as changes in cell proliferation or cell  
164 death, we next performed phospho-histone H3 (PHH3) immunohistochemistry as well  
165 as a TUNEL assay, respectively. Upon counting PHH3- or TUNEL-positive cells and  
166 comparing the contralateral control and MO-treated sides, we noted no statistically  
167 significant difference in either cell proliferation (Supp. Fig. 2A-D, arrows; 24 +/- 1 PHH3-  
168 positive cells for the control MO-treated side, 23 +/- 1 PHH3-positive cells for the  
169 contralateral side, p = 0.84; 24 +/- 1 PHH3-positive cells for the Cadherin-7 MO-treated  
170 side, 25 +/- 1 PHH3-positive cells for the contralateral side, p = 0.71) or cell death  
171 (Supp. Fig. 2E-H, arrows; 31 +/- 2 TUNEL-positive cells for the control MO-treated side,  
172 30 +/- 3 TUNEL-positive cells for the contralateral side, p = 0.63; 24 +/- 2 TUNEL-  
173 positive cells for the Cadherin-7 MO-treated side, 23 +/- 2 TUNEL-positive cells for the  
174 contralateral side, p = 0.71). As such, the overall organization of the trigeminal ganglion

175 appeared abnormal upon Cadherin-7 knockdown in neural crest cells due to effects on  
176 both migratory neural crest cells and placodal neurons unrelated to changes in cell  
177 proliferation or cell death.

178         Given the observed phenotypes in tissue sections, we next examined the  
179 distribution of neural crest cells and placodal neurons within the context of the entire  
180 trigeminal ganglion by performing whole-mount immunohistochemistry for HNK-1 and  
181 Tubb3, respectively. Lateral views of whole embryo heads at HH15-HH16 obtained by  
182 confocal microscopy revealed the normal distribution of neural crest cells and placodal  
183 neurons within the trigeminal ganglion in the presence of the control MO (Fig. 3A-D, n =  
184 10/10 embryos). In these images, the bundling of placodal neurons, and condensation  
185 with migratory neural crest cells that closely localized with placodal neurons, generated  
186 the stereotypical structure of the trigeminal ganglion that is revealed through the Tubb3-  
187 positive immunoreactivity of the placodal neurons (Fig. 3C, D, arrowheads). The  
188 morphology of the trigeminal ganglion is perturbed, however, upon MO-mediated  
189 knockdown of Cadherin-7 (Fig. 3E-H, n = 11/13 embryos). From these experiments, it is  
190 apparent that Cadherin-7-depleted neural crest cells still localized to the anlage,  
191 allowing them to intermingle with trigeminal neurons (compare Fig. 3F to Fig. 3B). Even  
192 with this seemingly correct localization, though, trigeminal neurons no longer bundled  
193 together correctly, leading to the appearance of a disorganized, less condensed  
194 trigeminal ganglion (compare Fig. 3G, H, arrowheads, to Fig. 3C, D, arrowheads).  
195 Collectively, these data provide evidence for a role for Cadherin-7 in neural crest cells  
196 during trigeminal ganglion assembly.

197

198 **Overexpression of Cadherin-7 negatively affects trigeminal ganglia assembly by**  
199 **impacting both neural crest cells and placodal neurons**

200 To further elucidate the function of Cadherin-7 in migratory cranial neural crest  
201 cells, we overexpressed Cadherin-7 and evaluated effects on the neural crest and  
202 placodal neuron populations forming the trigeminal ganglia. Cadherin-7 protein levels  
203 were increased by 200% over control, as assessed by immunoblotting for Cadherin-7 in  
204 lysates prepared from electroporated, dissected trigeminal ganglia possessing the  
205 control vector (pCIG) versus the Cadherin-7 expression construct (pCIG-Cad7, contains  
206 an IRES-GFP cassette to label electroporated cells; see Materials and Methods for  
207 details) (Supp. Fig. 3, n = 2). Next, we evaluated how augmented Cadherin-7 protein  
208 levels in neural crest cells affect trigeminal ganglia formation. To this end, we performed  
209 similar neural crest cell electroporation experiments and analyzed tissue sections (Fig.  
210 4) and whole embryo heads (Fig. 5) for changes in neural crest cells and/or placodal  
211 neurons contributing to the trigeminal ganglia. In the presence of the control pCIG  
212 vector (Fig. 4A), we noted no alterations in migratory neural crest cells (Fig. 4B, n = 8/8  
213 embryos) or placodal neurons (Fig. 4C, n = 8/8 embryos). These results indicate that  
214 the trigeminal ganglia assembled normally (Fig. 4D) and that the electroporation  
215 technique did not affect its formation. Cadherin-7 overexpression in neural crest cells,  
216 however, negatively impacted trigeminal ganglia assembly. Neural crest cells  
217 expressing increased levels of Cadherin-7 (Fig. 4E) did not associate with one another  
218 (and with placodal neurons) properly to generate the morphology of the ganglion that is  
219 typically observed upon sectioning (Fig. 4F, H', arrows; n = 13/15 embryos; compare to  
220 Fig. 4B, D', arrows). In turn, placodal neurons were also affected, exhibiting, in some

221 instances, a more round morphology, as opposed to the bipolar shape that these  
222 neurons normally possess, and were generally misshapen (Fig. 4G, H', arrowheads; n =  
223 21/22 embryos; compare to Fig. 4C, D', arrowheads).

224 To confirm that the observed phenotypes were not due to non-specific effects on  
225 cell proliferation or death, we conducted phospho-histone H3 immunohistochemistry  
226 and a TUNEL assay, respectively. We noted no statistically significant change in either  
227 cell proliferation (Supp. Fig. 4A-D, arrows; 31 +/- 1 PHH3-positive cells for the pCIG  
228 control-treated side, 30 +/- 1 PHH3-positive cells for the contralateral side, p = 0.82; 26  
229 +/- 1 PHH3-positive cells for the pCIG-Cad7-treated side, 26 +/- 1 PHH3-positive cells  
230 for the contralateral side, p = 0.72) or cell death (Supp. Fig. 4E-H, arrows; 22 +/- 2  
231 TUNEL-positive cells for the pCIG control-treated side, 21 +/- 2 TUNEL-positive cells for  
232 the contralateral side, p = 0.71; 31 +/- 2 TUNEL-positive cells for the pCIG-Cad7-treated  
233 side, 30 +/- 3 TUNEL-positive cells for the contralateral side, p = 0.78) in the presence  
234 of the control vector or Cadherin-7 overexpression construct. Collectively, these results  
235 further confirm that Cadherin-7 expression in neural crest cells is important for  
236 appropriate trigeminal ganglia assembly and that the noted phenotypes are not caused  
237 by changes in cell proliferation or cell death.

238 Given these results in tissue sections, we then analyzed whole embryo heads  
239 from HH15-HH16 embryos by confocal microscopy following immunostaining for HNK-1  
240 and Tubb3, as we had done previously with our MO-electroporated embryos (Fig. 5).  
241 Introduction of the pCIG control vector (Fig. 5A) into migratory neural crest cells  
242 revealed no effects on neural crest cell-placodal neuron interactions and, ultimately,  
243 trigeminal gangliogenesis (Fig. 5A-D, n = 7/7 embryos), as exemplified by Tubb3



244 immunoreactivity and the formation of a ganglion possessing a bi-lobed structure (Fig.  
245 5C, arrowheads). Cadherin-7 overexpression, however, disrupted trigeminal ganglia  
246 assembly, as evidenced by the presence of a disorganized ganglion in which placodal  
247 neurons did not properly condense with neural crest cells (Fig. 5E-H, n = 7/7 embryos).  
248 While HNK-1-positive neural crest cells migrated and localized to the ganglionic anlage,  
249 their distribution was noticeably different than that observed with the pCIG control  
250 vector, with neural crest cells aggregating together (compare Fig. 5E, F, arrows, to Fig.  
251 5A, B). Furthermore, trigeminal neurons did not form stereotypical bundles and  
252 appeared more disorganized within the anlage (compare Fig. 5C, D, arrowheads, to Fig.  
253 5G, H, arrowheads). Taken together with our knockdown data, these findings reveal the  
254 importance of controlling Cadherin-7 levels in neural crest cells, and ultimately proper  
255 neural crest cell-placodal neuron interactions, during trigeminal gangliogenesis.

256 **DISCUSSION**

257 **Migratory cranial neural crest cells contributing to the trigeminal ganglia express**  
258 **Cadherin-7 throughout early gangliogenesis**

259 The assembly of the cranial trigeminal ganglia requires the coalescence of  
260 distinct migratory cell populations, neural crest cells and placodal neurons, that are  
261 derived from different tissues (Breau and Schneider-Maunoury, 2015; D'Amico-Martel  
262 and Noden, 1983; Hamburger, 1961; Saint-Jeannet and Moody, 2014; Steventon et al.,  
263 2014). Cranial neural crest cells leave the neural ectoderm through an epithelial-to-  
264 mesenchymal transition and become highly invasive, migrating to the ganglionic anlage  
265 (Bronner and Simoes-Costa, 2016; Duband et al., 2015; Gougnard et al., 2018;  
266 Simoes-Costa and Bronner, 2015; Taneyhill and Schiffmacher, 2017). During their  
267 migration, cranial neural crest cells interact with placodal neurons, which have  
268 delaminated from the surface ectoderm and differentiated (Breau and Schneider-  
269 Maunoury, 2015; Theveneau et al., 2013). These interactions must be productive to  
270 allow for cell-cell adhesion and the eventual correct formation of the cranial ganglia. A  
271 prior study noted that N-cadherin expression in trigeminal placodal neurons is critical for  
272 mediating proper ganglia condensation (Shiau and Bronner-Fraser, 2009), but  
273 molecules important in cranial neural crest cells had yet to be identified. Here, we  
274 investigated the role of Cadherin-7 in neural crest cells during trigeminal ganglia  
275 assembly. We first documented the spatio-temporal expression pattern of Cadherin-7  
276 protein during early stages of trigeminal gangliogenesis. We observed Cadherin-7  
277 protein exclusively in migratory cranial neural crest cells as early as HH12 (not shown),  
278 with no protein present in trigeminal placodal precursors or their neuronal derivatives

279 (Fig. 1). These results now expand upon our prior publication examining the expression  
280 and function of adherens junction components in neural crest cells during trigeminal  
281 gangliogenesis ( $\alpha$ N-catenin in neural crest cells (Wu et al., 2014)). Taken together with  
282 these other publications, our new data establish the importance of cadherin-based  
283 adhesion during trigeminal ganglia formation, with distinct cadherins expressed in the  
284 neural crest cell (Cadherin-7) and placodal neuron (N-cadherin) populations.

285

### 286 **Trigeminal ganglia formation relies upon proper levels of Cadherin-7 in migratory** 287 **cranial neural crest cells**

288 To explore a function for Cadherin-7 in the cranial neural crest cell population, we  
289 undertook molecular perturbation assays to reduce (MO) or elevate (overexpression)  
290 Cadherin-7 levels in migratory neural crest cells. MO-mediated knockdown achieved a  
291 50% reduction in Cadherin-7 protein, as assessed by immunoblotting, which, in turn, led  
292 to drastic changes in trigeminal ganglia assembly (Figs. 2-3). Migratory neural crest  
293 cells depleted for Cadherin-7 still migrated to the ganglionic anlage, but their distribution  
294 was altered compared to neural crest cells in control MO-treated embryos. Moreover,  
295 trigeminal neurons were also affected at the level of both their morphology and  
296 distribution. In many instances these neurons remained round and did not elaborate  
297 protrusions characteristic of mature neurons, although they did express Tubb3,  
298 indicative of their molecular maturation. This alteration to trigeminal neuron morphology  
299 mirrors that observed upon loss of Annexin A6 (Shah et al., 2017) or N-cadherin (Shiau  
300 and Bronner-Fraser, 2009) in placodal neurons. Effects on trigeminal neurons upon  
301 changes to molecules in neural crest cells are not without precedent, as noted

302 previously upon depletion of  $\alpha$ N-catenin in neural crest cells, which leads to an altered  
303 trigeminal neuron distribution (noted in transverse sections) and bundling (observed in  
304 whole-mount), shown by immunohistochemistry for Islet-1 and Tubb3, respectively (Wu  
305 et al., 2014). Moreover, changes in N-cadherin levels in placodal neurons also affect  
306 neural crest cells contributing to the cranial ganglia (Shiau and Bronner-Fraser, 2009).  
307 Such cell non-autonomous effects are not surprising given that both N-cadherin and  
308 Cadherin-7 are transmembrane cell adhesion molecules.

309 Intriguingly, the trigeminal neurons of embryos possessing lower levels of  
310 Cadherin-7 in neural crest cells appear to associate with neural crest cells, but their  
311 localization within the anlage was noticeably different than what was observed for  
312 control MO-treated embryos. As such, the overall ganglion morphology appeared  
313 abnormal. This was particularly apparent in lateral whole-mount views of embryo heads  
314 following Cadherin-7 MO electroporation. In these experiments, Cadherin-7-depleted  
315 embryos possessed changes in both lobes of the forming trigeminal ganglion, with  
316 trigeminal neurons appearing more dispersed and/or less bundled. Collectively, our  
317 section and whole embryo results indicate that decreased levels of Cadherin-7 impact  
318 overall trigeminal ganglia assembly, likely at the level of both the neural crest cells and  
319 placodal neurons.

320 We next performed the converse experiment in which we overexpressed  
321 Cadherin-7 in migratory cranial neural crest cells. With a 200% increase in neural crest  
322 Cadherin-7 levels, as evaluated by immunoblotting, we noted, once again, defective  
323 trigeminal ganglia assembly, in both section and whole embryo images (Figs. 4-5). The  
324 morphology of analyzed trigeminal ganglia was altered upon Cadherin-7 overexpression

325 compared to control pCIG-treated embryos. In these experiments, it is apparent that  
326 neural crest cells still migrate to the anlage in the presence of elevated levels of  
327 Cadherin-7; however, their distribution is aberrant. Consequently, the location and  
328 morphology of trigeminal neurons is also negatively impacted. These neurons, while  
329 densely bundled and surrounded by neural crest cells in control embryos, are often  
330 times clustered together and exhibit an abnormal shape upon overexpression of  
331 Cadherin-7 in neural crest cells. These changes in the distribution of neural crest cells  
332 and placodal neurons are also noted in images of the forming trigeminal ganglia in  
333 whole embryo heads. Similar to our results in which Cadherin-7 levels are reduced,  
334 elevated levels of Cadherin-7 led to a noticeable change in the organization of Tubb3-  
335 positive trigeminal neurons. These cells no longer bundle and condense properly with  
336 neural crest cells, which instead are observed aggregating with other neural crest cells.  
337 Taken together, our knockdown and overexpression results establish a new role for  
338 Cadherin-7 in cranial neural crest cells during trigeminal ganglia assembly.

339

### 340 **Neural crest cell-placodal neuron adhesion plays a key role in trigeminal** 341 **gangliogenesis**

342 Our data indicate that neural crest cells possessing reduced or elevated levels of  
343 Cadherin-7 negatively affects trigeminal ganglia assembly, with defects noted in the  
344 distribution of neural crest cells and placodal neurons within the ganglionic anlage.  
345 Notably, these results cannot be attributed to changes in cell proliferation or cell death  
346 within the forming trigeminal ganglia (Supp. Figs. 2, 4). Therefore, our findings further  
347 underscore that cell adhesion molecules expressed by neural crest cells and placodal

348 neurons play key roles in regulating ganglia formation. Results published almost a  
349 decade ago described the importance of N-cadherin in placodal neurons, including its  
350 function in mediating placodal neuron aggregation (Shiau and Bronner-Fraser, 2009).  
351 In these experiments, MO-mediated knockdown of N-cadherin in trigeminal placode  
352 precursor cells impeded placodal neuron aggregation later in development. Placodal  
353 neurons appear more dispersed (evident in section and whole embryo images), much  
354 like what we observe for placodal neurons upon Cadherin-7 knockdown in neural crest  
355 cells. Moreover, N-cadherin overexpression also resulted in aberrant trigeminal ganglia  
356 assembly due to the presence of atypical clusters of placodal neurons, along with an  
357 apparent loss of placodal neurons (all noted in whole embryo images). This latter result  
358 is intriguing given the comparable placodal neuron phenotypes we observe in whole  
359 embryo heads upon Cadherin-7 overexpression in neural crest cells. Unfortunately,  
360 effects on the cranial neural crest cell population upon N-cadherin perturbation were not  
361 examined in this earlier report. Collectively, our findings reveal that alterations in the  
362 levels of cadherins in cranial neural crest cells and trigeminal neurons can severely  
363 impact proper ganglia assembly.

364         Given the observed effect on trigeminal neurons upon changes in neural crest  
365 cell Cadherin-7 levels, it is possible neural crest cell corridors do not form entirely  
366 correctly in embryos possessing neural crest cells with increased or decreased  
367 Cadherin-7 levels. These corridors provide a more permissive substrate (versus the  
368 mesoderm) upon which placodal neurons migrate during the formation of the cranial  
369 ganglia (Freter et al., 2013). We hypothesize that this could be one mechanism by  
370 which changes in neural crest cells affect the distribution and morphology of placodal

371 neurons. Furthermore, elevated levels of Cadherin-7 in neural crest cells could promote  
372 increased adhesion between neural crest cells and hinder the ability of these cells to  
373 form interactions with placodal neurons. Support for this hypothesis stems from our  
374 whole-mount immunohistochemistry images, which show aggregates of neural crest  
375 cells after Cadherin-7 overexpression (Fig. 5). Future studies will be necessary to  
376 determine whether parameters associated with neural crest cell adhesion and migration  
377 (e.g., velocity, directionality) are impacted upon changes in Cadherin-7. In addition, we  
378 surmise that alterations in Cadherin-7 levels in neural crest cells could influence N-  
379 cadherin distribution and/or levels in placodal neurons, although we have been unable  
380 to detect any qualitative changes in N-cadherin by immunohistochemistry upon  
381 Cadherin-7 depletion or overexpression. Based on our findings that cadherins are under  
382 a high degree of post-translational regulation (e.g., proteolysis: (Schiffmacher et al.,  
383 2014)), however, this does not preclude potential changes in placodal neuron adhesion,  
384 which will be borne out in future experiments.

385 In summary, our data provide additional evidence for the importance of properly  
386 regulating levels of cadherin proteins during trigeminal ganglia assembly. These  
387 findings point to a new role for Cadherin-7 in controlling the formation of the trigeminal  
388 ganglia. Altogether, these results further underscore the importance of cadherin-based  
389 intercellular interactions that are requisite for cranial gangliogenesis and proper  
390 patterning of the vertebrate peripheral nervous system.

391

392

393

## 394 **MATERIALS AND METHODS**

### 395 **Chick embryos**

396 Fertilized chicken eggs (*Gallus gallus*) were obtained from Centurion Poultry (GA) and  
397 Moyer's Chicks, Inc. (PA), and incubated at 37°C in humidified incubators  
398 (EggCartons.com, Manchaug, MA, USA). Embryos were staged by the Hamburger-  
399 Hamilton (HH) staging method (Hamburger and Hamilton, 1992) or by counting the  
400 number of somite pairs (somite stage, ss).

401

### 402 **Cadherin-7 morpholinos and expression constructs**

403 A 3' lissamine-labeled antisense translation-blocking Cadherin-7 morpholino (MO, 5-  
404 ACTCCACTTTGCCCAACTTCATCTT-3'), or a 5-base pair mismatch Cadherin-7 control  
405 MO (5'-AaTCCAaTTTGCCaAAaTTCATaTT-3') (start codon underlined, mismatches  
406 shown in lowercase), was designed to target the *Cadherin-7* transcript according to the  
407 manufacturer's criteria (GeneTools, LLC). Both MOs were used at a concentration of  
408 500 µM, as described previously (Wu et al., 2014). A DNA construct designed for  
409 Cadherin-7 overexpression (pCIG-Cad7), which contains an IRES-GFP cassette to  
410 label electroporated cells, was a kind gift from Dr. Marianne Bronner (California Institute  
411 of Technology). The control pCIG vector (just the IRES-GFP cassette), or pCIG-Cad7,  
412 was used at a concentration of 2.5 µg/µl as in (Wu et al., 2014).

413

### 414 ***In ovo* unilateral electroporations**

415 Unilateral electroporation of the early chick neural tube was conducted to target  
416 migratory neural crest cells in the trigeminal ganglionic anlage, as carried out previously



417 (Wu et al., 2014). Briefly, MOs or expression constructs were introduced into  
418 premigratory midbrain neural crest cells in developing 3 to 4 somite stage (3-4ss) chick  
419 embryos using fine glass needles and filling of the chick neural tube. Platinum  
420 electrodes were placed on either side of the embryo, and two 25 V, 25 ms electric  
421 pulses were applied across the embryo. Eggs were re-sealed with tape and parafilm, re-  
422 incubated for 12 hours, and then imaged *in ovo* around HH12 (prior to embryo turning)  
423 using a Zeiss Discovery.V8 stereomicroscope in order to evaluate presence of MOs or  
424 expression constructs. After imaging, eggs containing MO- or expression construct-  
425 positive embryos were re-sealed and re-incubated for the desired time period prior to  
426 harvesting for further experimentation.

427

## 428 **Immunoblotting**

429 Chick embryo neural crest cells were electroporated as described above with either MO  
430 or expression constructs. Approximately 35 hours post-electroporation, trigeminal  
431 ganglia were excised, pooled, pelleted, flash-frozen in liquid nitrogen, and stored at -  
432 80°C until required for immunoblot analysis. Protein lysis, extraction, fraction, and  
433 immunoblotting were performed as described previously (Shah et al., 2017;  
434 Schiffmacher et al., 2018). Briefly, pellets were thawed on ice and lysed in lysis buffer  
435 (50 mM Tris pH 8.0, 150 mM NaCl, 1% IGEPAL CA-630) supplemented with cComplete  
436 protease inhibitor cocktail (Roche, Basel, Switzerland) and 1 mM PMSF for 30 minutes  
437 at 4°C with periodic mixing. Soluble fractions were collected following centrifugation at  
438 max g for 15 minutes at 4°C, and protein concentration was quantified by Bradford  
439 assay (Thermo Fisher Scientific, Rockford, IL, USA). Equivalent amounts of protein per

440 sample were processed by SDS-PAGE (10% Mini-Protean TGX gel, BioRad #456-  
441 1034) and then transferred to 0.45 $\mu$ m BioTrace PVDF membrane (Pall, Port  
442 Washington, NY) via the iBlot transfer stack system (iBlot 2 Dry Blotting system, Life  
443 Technology # IB21001) according to the manufacturer's guidelines. Primary antibodies  
444 used for immunoblotting were Cadherin-7 (Developmental Studies Hybridoma Bank  
445 (DSHB), clone CCD7-1, 1:150) and  $\beta$ -actin (Santa Cruz Biotechnology sc-47778,  
446 1:1000). Immunoblot images for figures were gamma-modified and processed using  
447 Adobe Photoshop CC 2015.5 (Adobe Systems, San Jose, CA, USA). Immunoblot band  
448 volumes (intensities) were calculated from unmodified immunoblot images using Image  
449 Lab software (Bio-Rad, Hercules, CA, USA), and relative protein levels were determined  
450 by normalizing the volumes of Cadherin-7 bands to those of  $\beta$ -actin. Differences in the  
451 amount of Cadherin-7 were assessed by comparing normalized ratios between either  
452 control MO- and Cadherin-7 MO-treated samples, or pCIG- and pCIG-Cad7-treated  
453 samples, with the control MO- and pCIG-treated samples set to one.

454

#### 455 **Immunohistochemistry and TUNEL assay**

456 Embryos were collected at the designated stages for wild-type or post-electroporation  
457 immunohistochemistry. Detection of various proteins was performed in whole-mount  
458 following overnight fixation in 4% PFA, or on 14 $\mu$ m transverse sections following 4%  
459 PFA fixation, gelatin embedding, and cryostat sectioning as described previously (Shah  
460 et al., 2017; Wu et al., 2014). All primary and secondary antibodies were diluted in 1X  
461 Phosphate-buffered saline + 0.1% Triton X-100 (PBSTX) + 5% sheep serum. The  
462 following antibodies and dilutions were used for immunohistochemistry: Cadherin-7

463 (DSHB, clone CCD7-1, 1:100); N-cadherin (DSHB, clone MNCD2, 1:200); HNK-1  
464 (DSHB, clone 3H5, 1:100); Tubb3 (Abcam 2G10, ab78078, 1:500); Annexin A6  
465 (Abnova, PAB18085, 1:100); GFP (Abcam, ab6662, 1:300); and phospho-histone H3  
466 (Millipore, 1:200). The following secondary antibodies were used at 1:200-1:500  
467 dilutions: goat anti-mouse IgG (Life Technologies, Cadherin-7); goat anti-rat IgG (Life  
468 Technologies, N-cadherin); goat anti-mouse IgM (Life Technologies, HNK-1); goat anti-  
469 mouse IgG<sub>2a</sub> (Southern Biotech, Tubb3); and goat anti-rabbit IgG (Life Technologies,  
470 Annexin A6 and phospho-histone H3). Sections were stained with 4',6-diamidino-2-  
471 phenylindole (DAPI) to mark cell nuclei using DAPI-containing mounting media  
472 (Fluoromount G, Southern Biotech). A TUNEL assay (Roche, TMR red and fluorescein)  
473 was performed on 4% PFA-fixed, cryopreserved sections to detect apoptotic cells as  
474 described previously (Shah et al., 2017; Wu et al., 2014) followed by mounting of slides  
475 with DAPI-containing media as outlined above.

476

### 477 **Confocal Imaging**

478 For all experiments, images of at least five serial transverse sections through a  
479 minimum of eight embryos (unless indicated otherwise), or of a minimum of seven  
480 embryo heads (unless indicated otherwise), were acquired with the LSM Zeiss 800  
481 confocal microscope with Airyscan detection (Carl Zeiss Microscopy, Thornwood, NY,  
482 USA) at 20X or 5X magnification, respectively. To acquire images of the trigeminal  
483 ganglion in the chick head, embryos were mounted on viewing slides, and a lateral view  
484 of the chick head containing the forming trigeminal ganglion was captured. Where  
485 possible, the laser power, gain, and offset were kept consistent for the different

486 channels throughout all experiments. Image processing was conducted with the Zen  
487 Blue software (Carl Zeiss Microscopy) and Adobe Photoshop CC 2015.5.

488

#### 489 **Quantification and statistical analysis**

490 To analyze the effect of Cadherin-7 knockdown or overexpression on cell proliferation  
491 and cell death, phospho-histone H3- and TUNEL-positive cells were counted following  
492 immunohistochemistry (or TUNEL assay) using the Adobe Photoshop count tool. Cells  
493 were counted within the region of the forming trigeminal ganglion in a minimum of five  
494 serial transverse sections taken from at least three electroporated embryos per  
495 treatment, on both the experimentally-treated and contralateral control sides of the  
496 section. Cell counts were then compared within embryo treatment groups. All results are  
497 reported as the average number of phospho-histone H3- or TUNEL-positive cells, plus  
498 or minus the standard error of the mean, and were analyzed with an unpaired Student's  
499 t test to establish statistical significance as carried out previously (Shah et al., 2017; Wu  
500 et al., 2014).

501

502

503

504

505 **ACKNOWLEDGMENTS**

506 We thank Ms. Vinona Muralidaran, Ms. Reethika Maddineni, and Ms. Julie Ren for  
507 excellent technical assistance. We also thank Dr. Marianne Bronner (California Institute  
508 of Technology) for the Cadherin-7 expression construct (pCIG-Cad7). The authors  
509 declare no competing financial interests. This work was supported by a grant to L.A.T.  
510 (NIH R01DE024217).

511

512 **REFERENCES**

- 513 Baker, C.V., Bronner-Fraser, M., 2001. Vertebrate cranial placodes I. Embryonic  
514 induction. *Dev Biol* 232, 1-61.
- 515 Breau, M.A., Schneider-Maunoury, S., 2015. Cranial placodes: models for exploring the  
516 multi-facets of cell adhesion in epithelial rearrangement, collective migration and  
517 neuronal movements. *Dev Biol* 401, 25-36.
- 518 Bronner, M.E., Simoes-Costa, M., 2016. The Neural Crest Migrating into the Twenty-  
519 First Century. *Curr Top Dev Biol* 116, 115-134.
- 520 Bronner-Fraser, M., 1986. Analysis of the early stages of trunk neural crest migration in  
521 avian embryos using monoclonal antibody HNK-1. *Dev Biol* 115, 44-55.
- 522 D'Amico-Martel, A., Noden, D.M., 1980. An autoradiographic analysis of the  
523 development of the chick trigeminal ganglion. *J Embryol Exp Morphol* 55, 167-182.
- 524 D'Amico-Martel, A., Noden, D.M., 1983. Contributions of placodal and neural crest cells  
525 to avian cranial peripheral ganglia. *Am J Anat* 166, 445-468.
- 526 Duband, J.L., Dady, A., Fleury, V., 2015. Resolving time and space constraints during  
527 neural crest formation and delamination. *Curr Top Dev Biol* 111, 27-67.
- 528 Freter, S., Fleenor, S.J., Freter, R., Liu, K.J., Begbie, J., 2013. Cranial neural crest cells  
529 form corridors prefiguring sensory neuroblast migration. *Development* 140, 3595-3600.
- 530 Gougnard, N., Andrieu, C., Theveneau, E., 2018. Neural crest delamination and  
531 migration: Looking forward to the next 150 years. *Genesis*, e23107.
- 532 Hamburger, V., 1961. Experimental analysis of the dual origin of the trigeminal ganglion  
533 in the chick embryo. *J Exp Zool* 148, 91-123.

534 Jidigam, V.K., Gunhaga, L., 2013. Development of cranial placodes: insights from  
535 studies in chick. *Dev Growth Differ* 55, 79-95.

536 Moody, S.A., Quigg, M.S., Frankfurter, A., 1989. Development of the peripheral  
537 trigeminal system in the chick revealed by an isotype-specific anti-beta-tubulin  
538 monoclonal antibody. *J Comp Neurol* 279, 567-580.

539 Nakagawa, S., Takeichi, M., 1995. Neural crest cell-cell adhesion controlled by  
540 sequential and subpopulation-specific expression of novel cadherins. *Development* 121,  
541 1321-1332.

542 Nakagawa, S., Takeichi, M., 1998. Neural crest emigration from the neural tube  
543 depends on regulated cadherin expression. *Development* 125, 2963-2971.

544 Saint-Jeannet, J.P., Moody, S.A., 2014. Establishing the pre-placodal region and  
545 breaking it into placodes with distinct identities. *Dev Biol* 389, 13-27.

546 Schiffmacher, A.T., Padmanabhan, R., Jhingory, S., Taneyhill, L.A., 2014. Cadherin-6B  
547 is proteolytically processed during epithelial-to-mesenchymal transitions of the cranial  
548 neural crest. *Molecular biology of the cell* 25, 41-54.

549 Shah, A., Schiffmacher, A.T., Taneyhill, L.A., 2017. Annexin A6 controls neuronal  
550 membrane dynamics throughout chick cranial sensory gangliogenesis. *Dev Biol* 425,  
551 85-99.

552 Shah, A., Taneyhill, L.A., 2015. Differential expression pattern of Annexin A6 in chick  
553 neural crest and placode cells during cranial gangliogenesis. *Gene Expr Patterns* 18,  
554 21-28.

555 Shiau, C., Lwigale, P., Das, R., Wilson, S., Bronner-Fraser, M., 2008. Robo2-Slit1  
556 dependent cell-cell interactions mediate assembly of the trigeminal ganglion. *Nature*  
557 *neuroscience* 11, 269-276.

558 Shiau, C.E., Bronner-Fraser, M., 2009. N-cadherin acts in concert with Slit1-Robo2  
559 signaling in regulating aggregation of placode-derived cranial sensory neurons.  
560 *Development* 136, 4155-4164.

561 Simoes-Costa, M., Bronner, M.E., 2015. Establishing neural crest identity: a gene  
562 regulatory recipe. *Development* 142, 242-257.

563 Smith, A.C., Fleenor, S.J., Begbie, J., 2015. Changes in gene expression and cell  
564 shape characterise stages of epibranchial placode-derived neuron maturation in the  
565 chick. *J Anat* 227, 89-102.

566 Steventon, B., Mayor, R., Streit, A., 2014. Neural crest and placode interaction during  
567 the development of the cranial sensory system. *Dev Biol* 389, 28-38.

568 Taneyhill, L.A., Schiffmacher, A.T., 2017. Should I stay or should I go? Cadherin  
569 function and regulation in the neural crest. *Genesis* 55.

570 Theveneau, E., Steventon, B., Scarpa, E., Garcia, S., Trepap, X., Streit, A., Mayor, R.,  
571 2013. Chase-and-run between adjacent cell populations promotes directional collective  
572 migration. *Nat Cell Biol* 15, 763-772.

573 Wu, C.Y., Hooper, R.M., Han, K., Taneyhill, L.A., 2014. Migratory neural crest cell  
574 alphaN-catenin impacts chick trigeminal ganglia formation. *Dev Biol* 392.

575

576



577 **FIGURE LEGENDS**

578 **Figure 1. Cadherin-7 protein is observed in migratory neural crest cells**  
579 **contributing to the cranial trigeminal ganglia.** Representative transverse sections  
580 taken at the axial level of the forming trigeminal ganglia over four chick embryo stages  
581 (HH13-16) followed by immunohistochemistry for Cadherin-7 (green), HNK-1 (red,  
582 labels neural crest cells), and Annexin A6 (purple, labels placodal neurons). (A-D)  
583 Lower magnification images show the entire transverse section and reveal Cadherin-7  
584 immunoreactivity. Higher magnification images (A'-D') of the boxed area in (A-D) show  
585 Cadherin-7- and HNK-1-double-positive neural crest cells at all stages (arrows),  
586 whereas Annexin A6-positive placodal neurons are devoid of Cadherin-7. DAPI (blue)  
587 labels cell nuclei. Ectoderm, neural tube, and trigeminal ganglion are denoted by e, NT,  
588 and TG, respectively. Scale bar in (A) is 100 $\mu$ m and applicable to (B-D), while scale bar  
589 in (A') is 5 $\mu$ m and applicable to (B'-D').

590

591 **Figure 2. Morpholino-mediated depletion of Cadherin-7 from migratory cranial**  
592 **neural crest cells alters the distribution of neural crest cells and placodal neurons**  
593 **within the forming trigeminal ganglia.** Representative transverse sections taken at  
594 the axial level of the forming trigeminal ganglia after electroporation of a 5 bp mismatch  
595 control Cadherin-7 morpholino (Control MO, A-D') or Cadherin-7 MO (Cad7 MO, E-H')  
596 into premigratory neural crest cells at the 3ss followed by immunohistochemistry for  
597 HNK-1 (green) and Tubb3 (purple). (D', H') Higher magnification images of the boxed  
598 regions in (D, H). (A-D') A typical trigeminal ganglion containing the control MO in the  
599 neural crest (A) exhibits a stereotypical “tear drop” morphology in section at this axial  
600 level due to the coalescence of neural crest cells (B, D) with placodal neurons (C, D). At

601 higher magnification (D'), HNK-1-positive neural crest cells (arrows) surround Tubb3-  
602 positive placodal neurons (arrowheads), many of which are already becoming bundled  
603 and adopting the bipolar morphology associated with neuronal maturation. Conversely,  
604 a trigeminal ganglion containing the Cadherin-7 MO in the neural crest (A) possess an  
605 abnormal morphology due to the position of the neural crest cells (F, H, arrows) and  
606 placodal neurons (G, H, arrowheads) within the anlage. At higher magnification (H'), it is  
607 apparent that neural crest cells still surround the placodal neurons (arrows), but the  
608 shape adopted by the placodal neurons is aberrant, with neurons appearing round  
609 (arrowheads). DAPI (blue) labels cell nuclei. e, ectoderm. Scale bar in (A) is 67 $\mu$ m and  
610 applicable to (B-H), while scale bar in (D') is 20 $\mu$ m and applicable to (H').

611

612 **Figure 3. Cadherin-7 depletion in migratory neural crest cells alters the gross**  
613 **morphology of the trigeminal ganglion.** Representative lateral views (optical section)  
614 of the forming trigeminal ganglion in an HH15 chick head after electroporation of a 5 bp  
615 mismatch control Cadherin-7 MO (Control MO, A-D) or Cadherin-7 MO (Cad7 MO, E-H)  
616 at the 3ss, followed by whole-mount immunohistochemistry for HNK-1 (green) and  
617 Tubb3 (purple). Merge images are shown in (D, H). Trigeminal ganglia electroporated  
618 with the control MO in neural crest cells (A) exhibit a condensed, organized morphology,  
619 with neural crest cells (B) associating with placodal neurons that are forming nerve  
620 bundles (C, arrowheads). Those trigeminal ganglia electroporated with the Cadherin-7  
621 MO in the neural crest (E) possess neural crest cells that migrate to the anlage (F) but  
622 exhibit less bundling of placodal neurons (G, arrowheads), leading to an aberrant

623 ganglion shape relative to control. TG, trigeminal ganglion. Scale bar in (A) is 200 $\mu$ m  
624 and applies to all images.

625

626 **Figure 4. Overexpression of Cadherin-7 in migratory cranial neural crest cells**  
627 **alters the distribution of neural crest cells and placodal neurons within the**  
628 **forming trigeminal ganglia.** Representative transverse sections taken at the axial  
629 level of the forming trigeminal ganglia after electroporation of the pCIG control vector  
630 (pCIG, A-D') or the pCIG-Cadherin-7 vector (pCIG-Cad7, E-H') into premigratory neural  
631 crest cells at the 3ss followed by immunohistochemistry for HNK-1 (red) and Tubb3  
632 (purple). The pCIG vector contains an IRES-GFP cassette to label electroporated cells.  
633 (D', H') Higher magnification images of the boxed regions in (D, H). (A-D') A trigeminal  
634 ganglion containing the control pCIG vector in the neural crest (A) possesses a  
635 stereotypical "tear drop" morphology that is noted in section at this axial level due to the  
636 coalescence of neural crest cells (B, D) with placodal neurons (C, D). At higher  
637 magnification (D'), HNK-1-positive neural crest cells (arrows) form corridors around  
638 Tubb3-positive placodal neurons (arrowheads), many of which are elaborating neuronal  
639 protrusions indicative of neuronal maturation. On the other hand, neural crest cells with  
640 elevated levels of Cadherin-7 protein (E) do not distribute correctly in the ganglionic  
641 anlage (F, H, arrows), and placodal neurons also localize incorrectly (G, H, arrowheads).  
642 At higher magnification (H'), neural crest cells are noted around the placodal neurons  
643 (arrows), but placodal neuron morphology is abnormal, with neurons appearing round  
644 and/or misshapen (arrowheads). DAPI (blue) labels cell nuclei. e, ectoderm. Scale bar

645 in (A) is 50 $\mu$ m and applicable to (B-H), while scale bar in (D') is 20 $\mu$ m and applicable to  
646 (H').

647

648 **Figure 5. Elevated levels of Cadherin-7 in migratory neural crest cells alter the**

649 **gross morphology of the trigeminal ganglia.** Representative lateral views (optical

650 section) of the forming trigeminal ganglion in an HH15 chick head after electroporation

651 of the pCIG control vector (pCIG, A-D) or the pCIG-Cadherin-7 vector (pCIG-Cad7, E-H)

652 at the 3ss, followed by whole-mount immunohistochemistry for HNK-1 (red) and Tubb3

653 (purple). Merge images are shown in (D, H). Trigeminal ganglia electroporated with the

654 control pCIG vector in neural crest cells (A) exhibit a condensed, organized morphology,

655 with neural crest cells (B) associating with placodal neurons that are forming nerve

656 bundles (C, arrowheads). Those trigeminal ganglia electroporated with pCIG-Cad7 in

657 the neural crest (E) possess neural crest cells that migrate to the anlage but appear to

658 aggregate together, thus altering their general distribution in the anlage (F, arrows).

659 Placodal neurons are also affected, exhibiting less bundling and an overall disorganized

660 phenotype (G, arrowheads). Together, this leads to an abnormal ganglion shape

661 relative to control. TG, trigeminal ganglion. Scale bar in (A) is 200 $\mu$ m and applies to all

662 images.

663

664 **SUPPLEMENTAL FIGURE LEGENDS**

665 **Supplemental Figure 1. Knockdown of Cadherin-7 with a translation-blocking**  
666 **morpholino antisense oligonucleotide targeting *Cadherin-7* effectively reduces**  
667 **Cadherin-7 protein in migratory neural crest cells contributing to the trigeminal**  
668 **ganglia.** Premigratory neural crest cells were electroporated at the 2-3ss with either the  
669 Cadherin-7 morpholino (Cad7 MO) to allow for depletion of Cadherin-7 protein in  
670 migratory neural crest cells, or a 5 bp mismatch Cadherin-7 control MO (Ctrl MO).  
671 Embryos were re-incubated to HH15-17 after which time the trigeminal ganglion-forming  
672 region on the electroporated side of the embryo was dissected out of the embryo and  
673 pooled for lysate preparation. Immunoblotting for Cadherin-7 and  $\beta$ -actin (control) was  
674 performed as in (Shah et al., 2017), with a representative immunoblot shown.  
675 Knockdown efficiency was assessed as previously described (Shah et al., 2017), with  
676 graph revealing results of immunoblot analysis as determined by normalizing Cadherin-  
677 7 to  $\beta$ -actin and calculating the reduction in this normalized ratio from that obtained for  
678 the control MO-treated lysate (arbitrarily set to 1,  $n = 2$ ). The mean and standard error of  
679 the mean are shown. A 50% knockdown in Cadherin-7 protein levels is noted in the  
680 Cadherin-7 MO-treated lysate compared to the control MO-treated lysate.

681

682 **Supplemental Figure 2. Electroporation of either the control or Cadherin-7**  
683 **morpholino does not alter cell proliferation or cell death in the trigeminal**  
684 **ganglionic anlage.** Representative transverse sections taken at the axial level of the  
685 the forming trigeminal ganglia after electroporation of a 5 bp mismatch control Cadherin-  
686 7 morpholino (Control MO: A, B, E, F) or Cadherin-7 morpholino (Cad7 MO: C, D, G, H)

687 into premigratory neural crest cells at the 3ss followed by immunohistochemistry for  
688 phospho-histone H3 (PHH3, A-D) or TUNEL (E-H). Contralateral (A, C, E, G) and  
689 morpholino-treated (B, D, F, H) sides are shown to provide a means of comparison.  
690 Arrows indicate PHH3 (A-D)- and TUNEL (E-H)-positive nuclei, with a comparable  
691 number noted in the presence of either morpholino relative to the contralateral control  
692 side of the electroporated embryo. DAPI (blue) labels cell nuclei. Ectoderm (e) is oriented  
693 to the left within each image panel and may not be visible in the field of view for some  
694 images. Scale bar in (A) is 67 $\mu$ m and applies to (B, E, F), while scale bar in (C) is 50 $\mu$ m  
695 and applies to (D, G, H).

696

697 **Supplemental Figure 3. Overexpression of Cadherin-7 effectively increases**  
698 **Cadherin-7 protein in neural crest cells contributing to the trigeminal ganglia.**

699 Premigratory neural crest cells were electroporated at the 2-3ss with either a Cadherin-  
700 7 expression construct (pCIG-Cad7) to allow for overexpression of Cadherin-7 protein in  
701 migratory neural crest cells, or the control vector (pCIG). Embryos were re-incubated to  
702 HH15-17 after which time the trigeminal ganglion-forming region on the electroporated  
703 side of the embryo was dissected out of the embryo and pooled for lysate preparation.  
704 Immunoblotting for Cadherin-7 and  $\beta$ -actin (control) was performed as in (Shah et al.,  
705 2017), with a representative immunoblot shown. Overexpression efficiency was  
706 assessed as previously described (Shah et al., 2017), with graph indicating results of  
707 immunoblot analysis as determined by normalizing Cadherin-7 to  $\beta$ -actin and calculating  
708 the increase in this normalized ratio from that obtained for the pCIG-treated lysate  
709 (arbitrarily set to 1, n = 2). The mean and standard error of the mean are shown. A

710 200% increase in Cadherin-7 protein levels is noted in the pCIG-Cad7-treated lysate  
711 compared to the control pCIG-treated lysate.

712

713 **Supplemental Figure 4. Electroporation of expression constructs does not alter**  
714 **cell death or cell proliferation in the trigeminal ganglionic anlage.** Representative  
715 transverse sections taken at the axial level of the forming trigeminal ganglia after  
716 electroporation of the pCIG control vector (pCIG: A, B, E, F) or pCIG-Cadherin-7 vector  
717 (pCIG-Cad7: C, D, G, H) into premigratory neural crest cells at the 3ss followed by  
718 immunohistochemistry for phospho-histone H3 (PHH3, A-D) or TUNEL (E-H).  
719 Contralateral (A, C, E, G) and expression vector-treated (B, D, F, H) sides are shown to  
720 provide a means of comparison. Arrows indicate PHH3 (A-D)- and TUNEL (E-H)-  
721 positive nuclei, with a comparable number noted in the presence of either expression  
722 construct relative to the contralateral control side of the electroporated embryo. DAPI  
723 (blue) labels cell nuclei. Ectoderm (e) is oriented to the left within each image panel.  
724 Scale bar in (A) is 60 $\mu$ m and applies to (B-D), while scale bar in (E) is 60 $\mu$ m and is  
725 applies to (F-H).

726

727

728

729

730

731

732

733



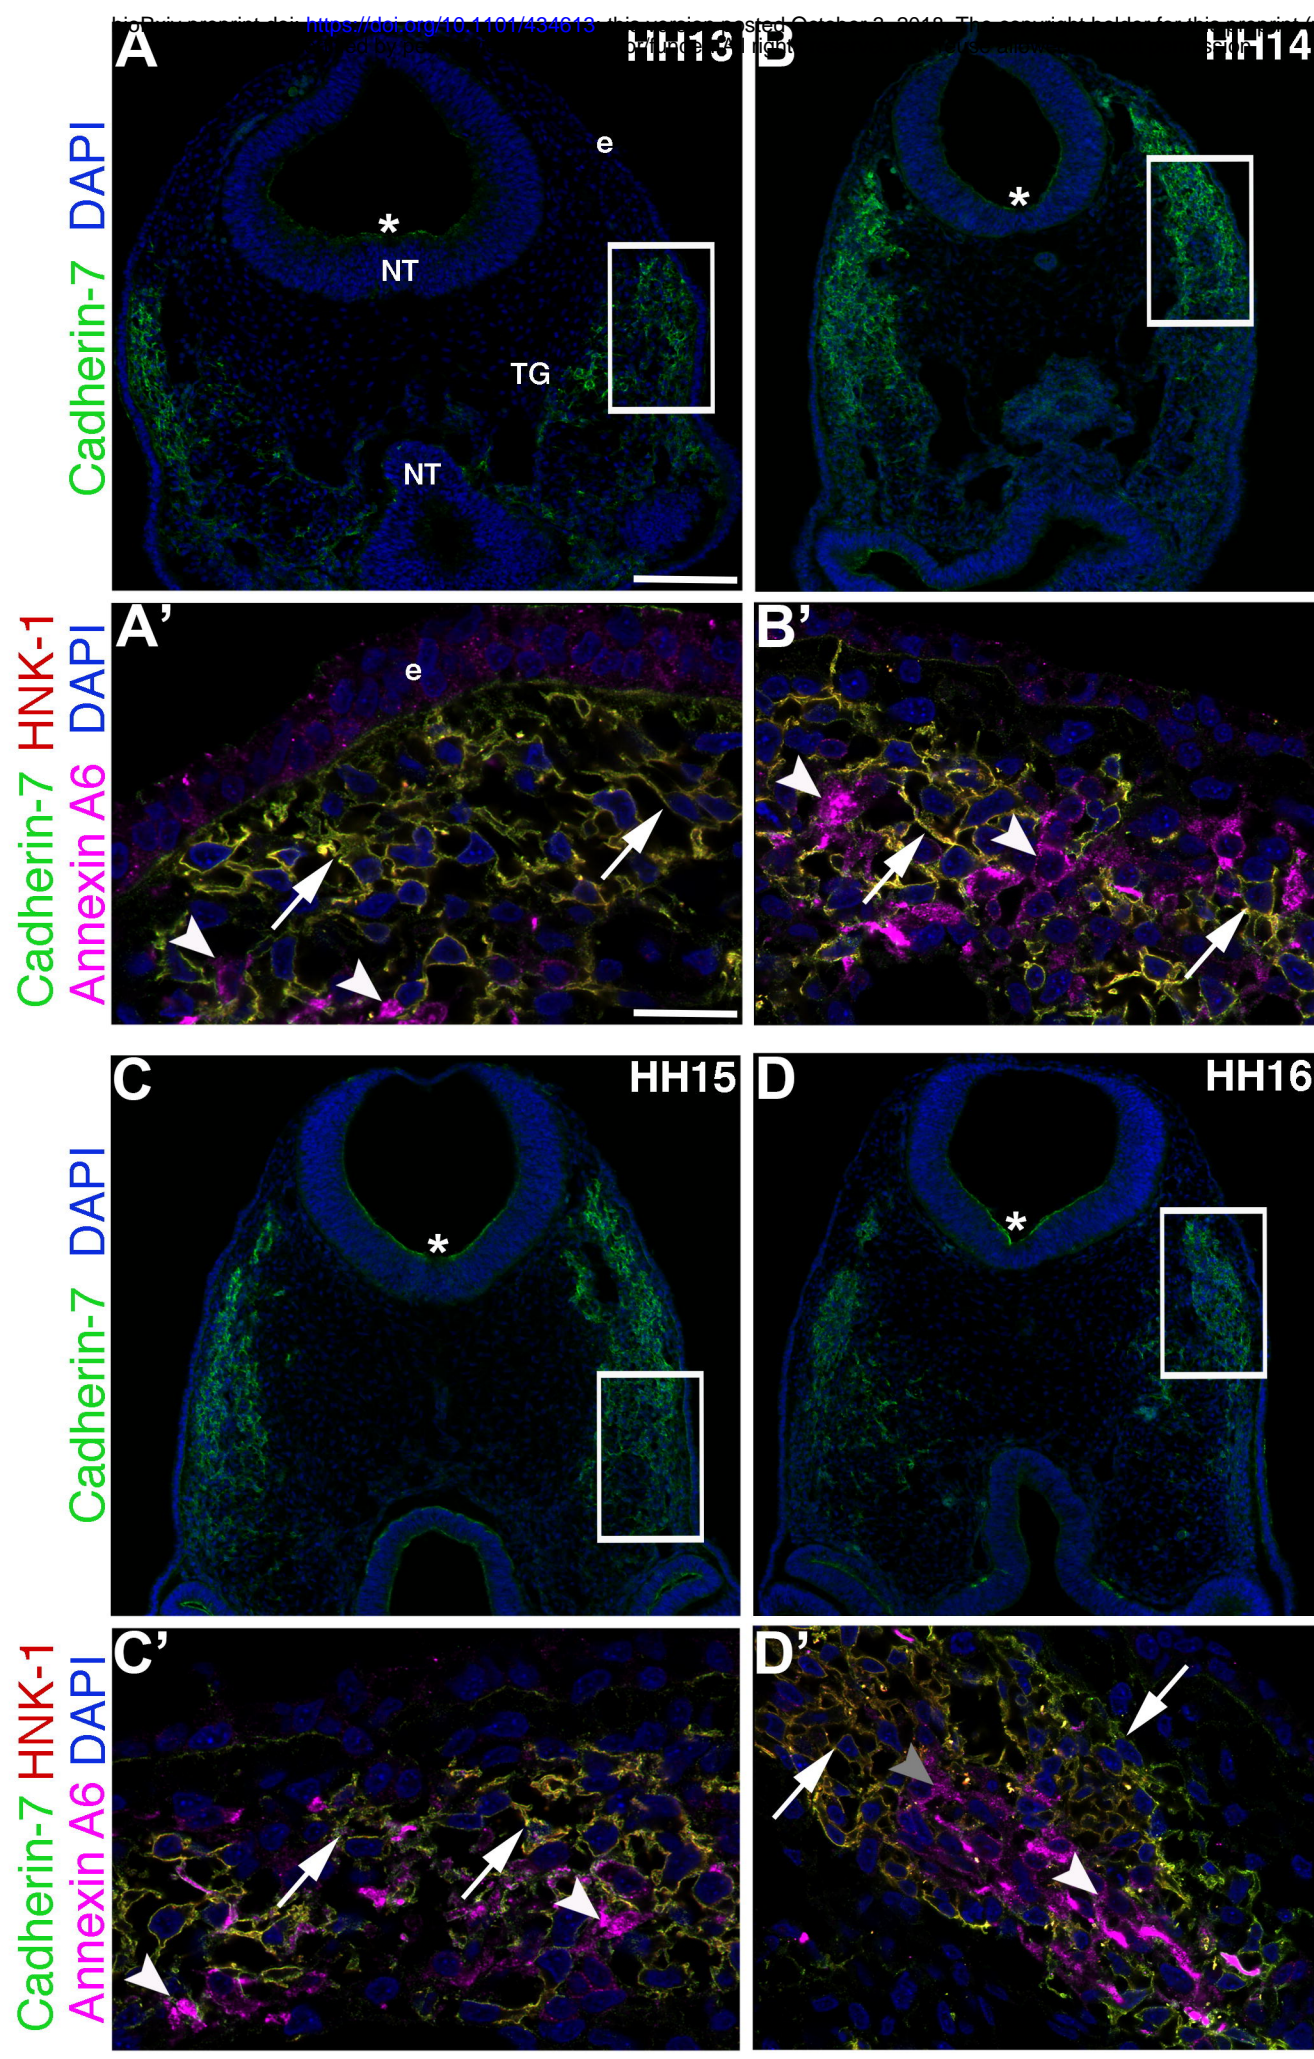



**Figure 2**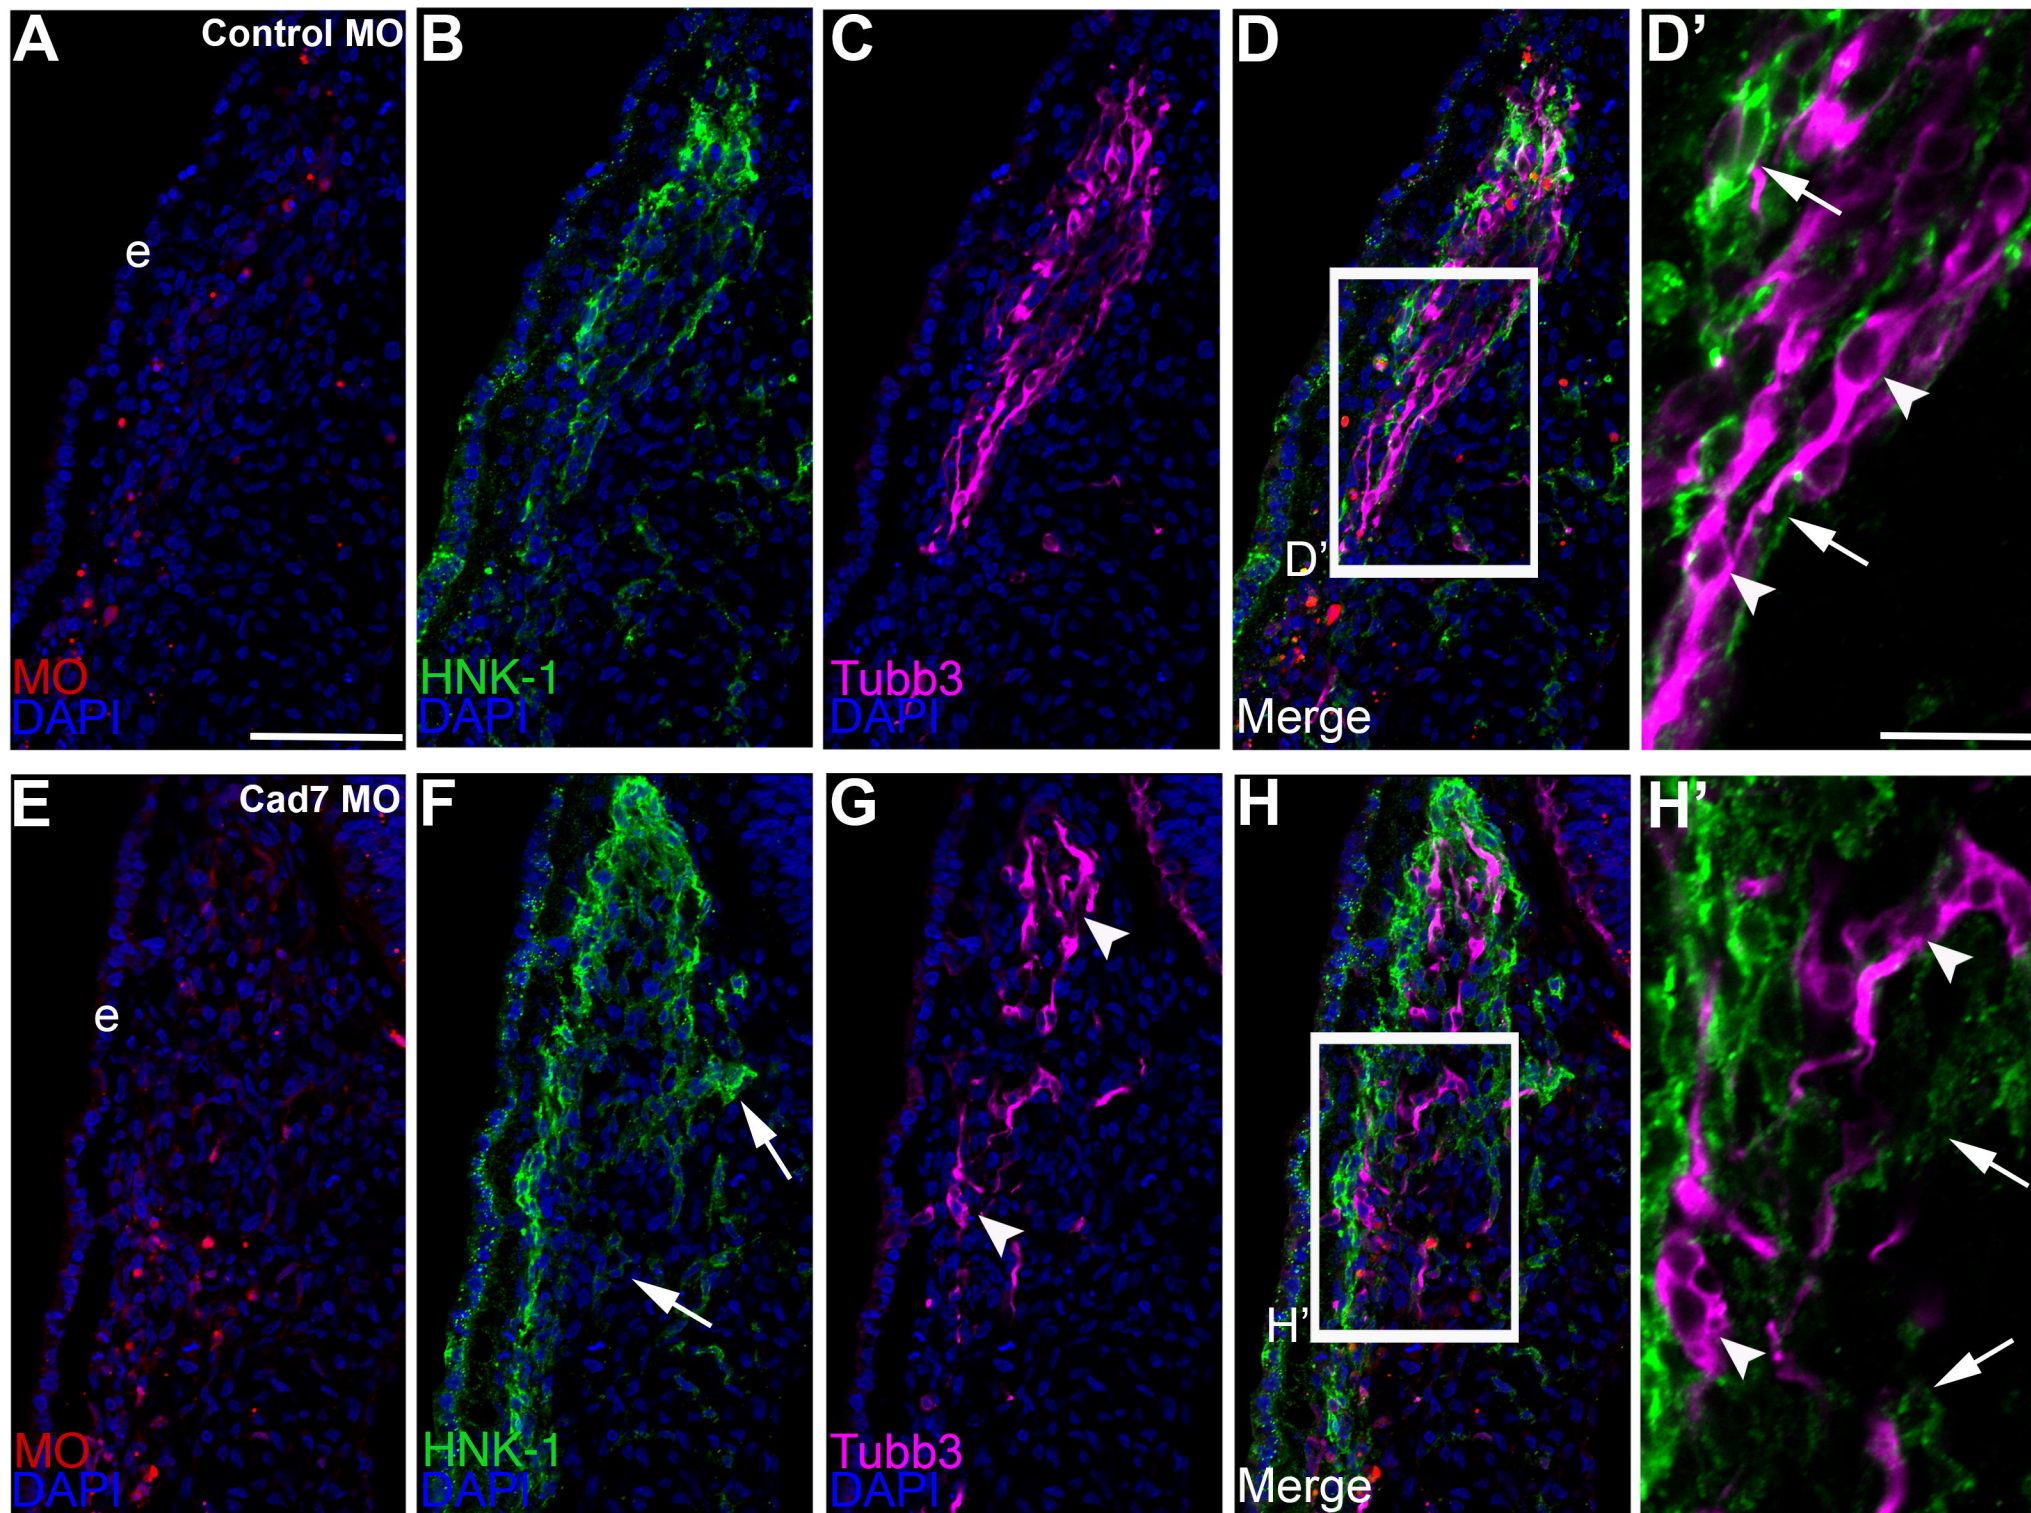



**Figure 3**

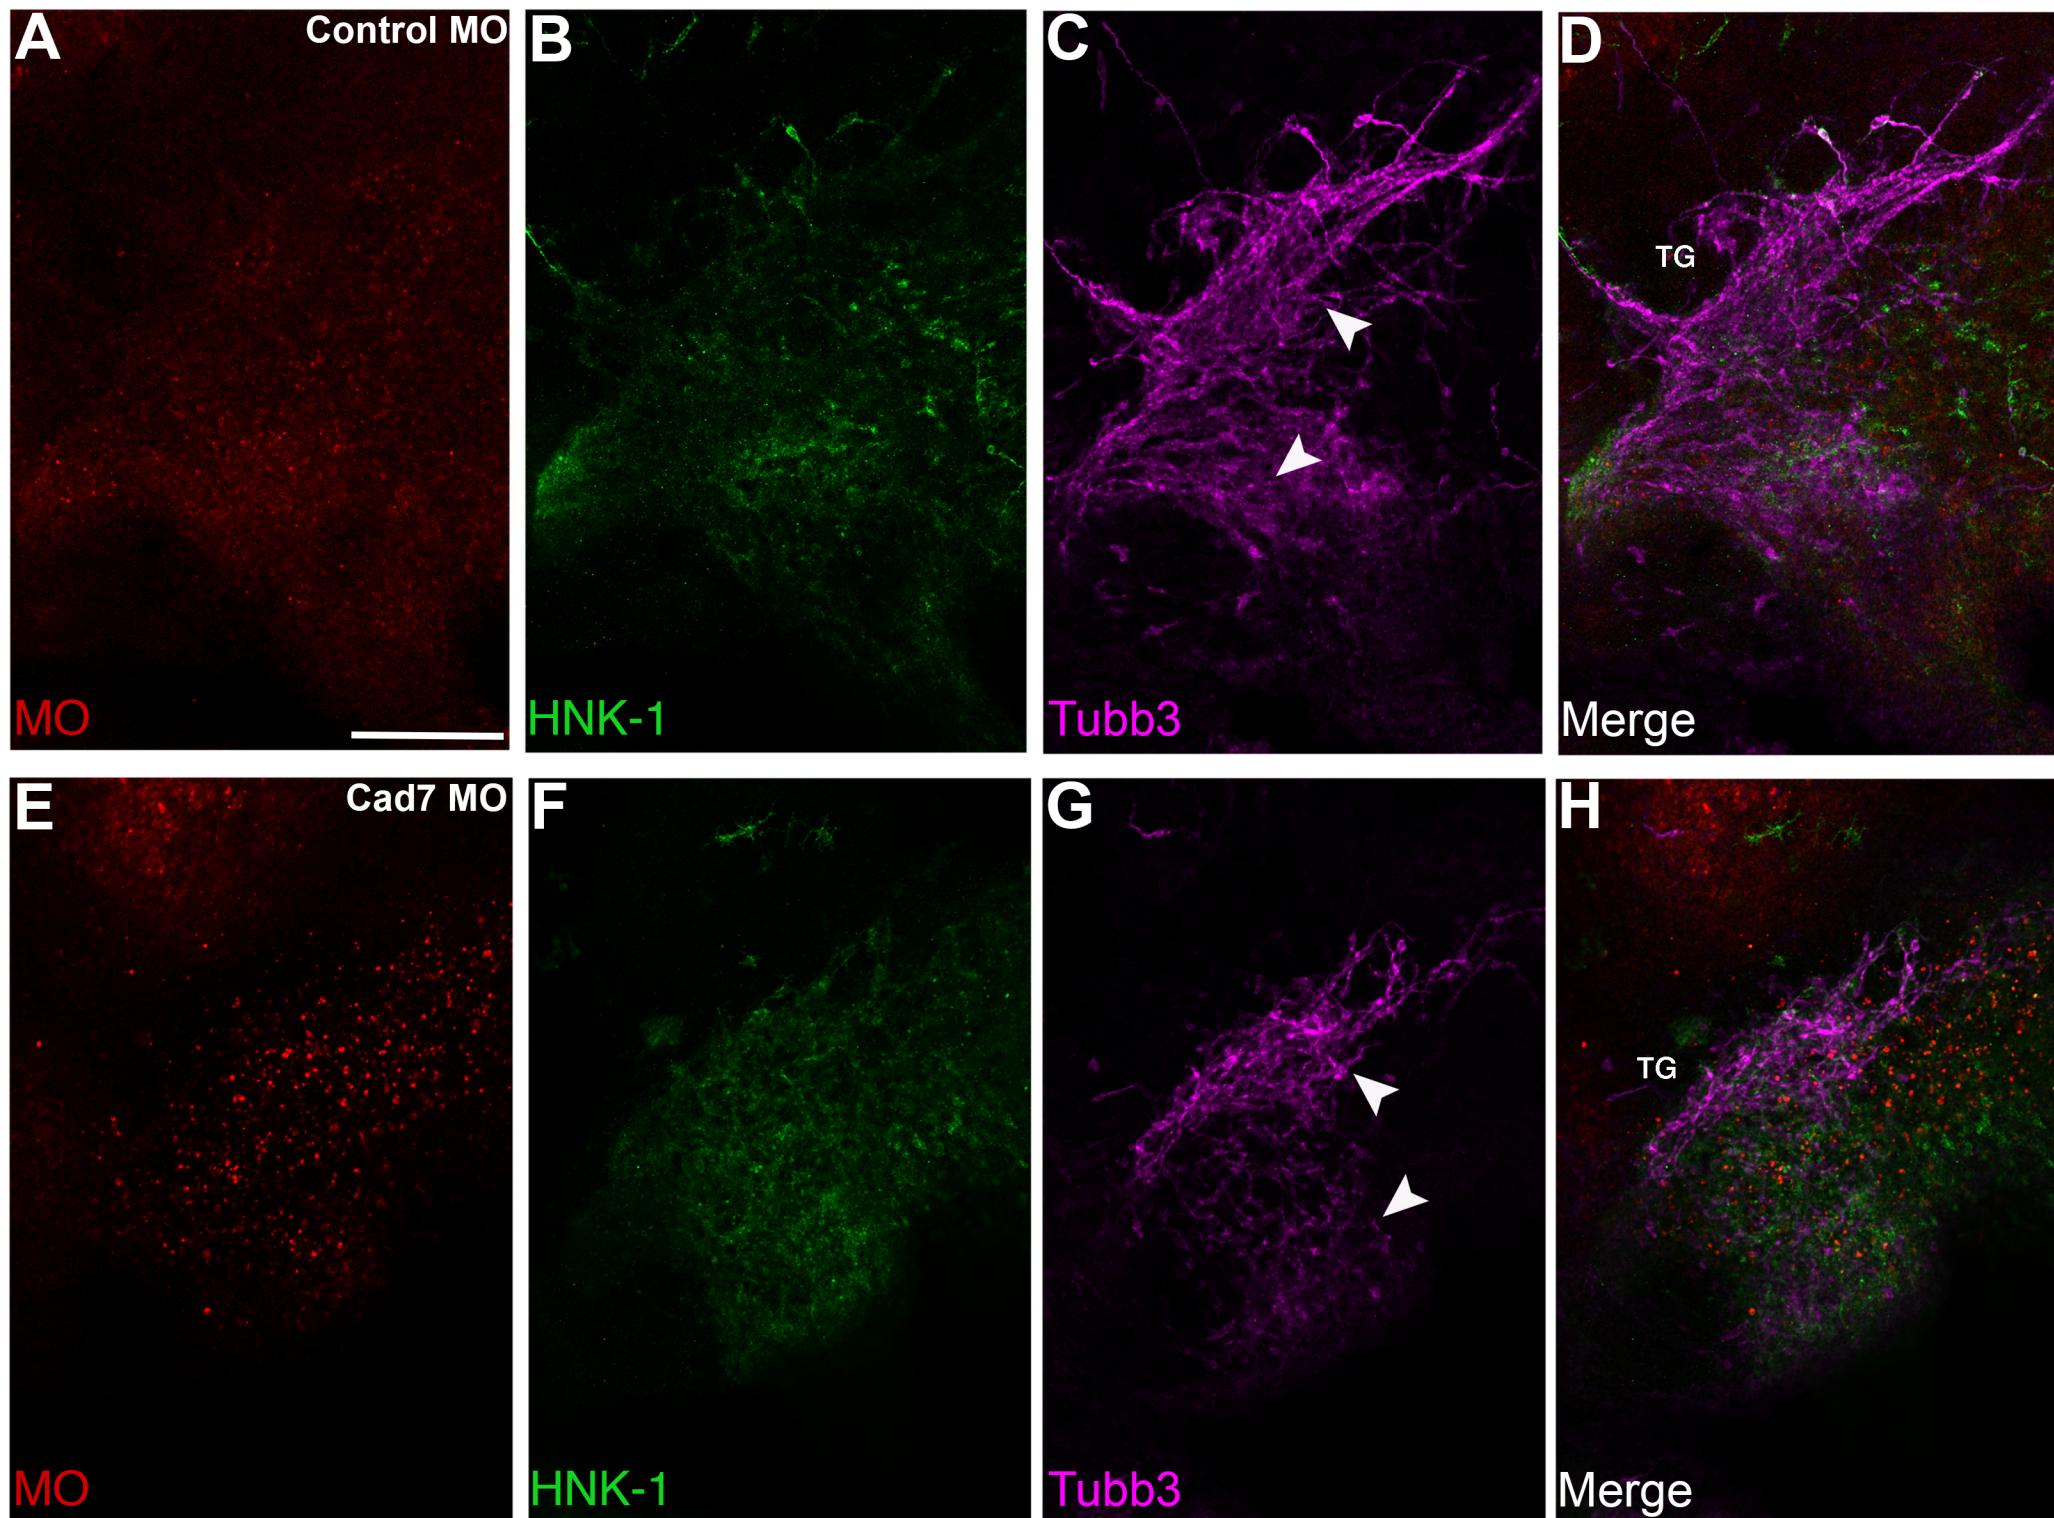



Figure 4

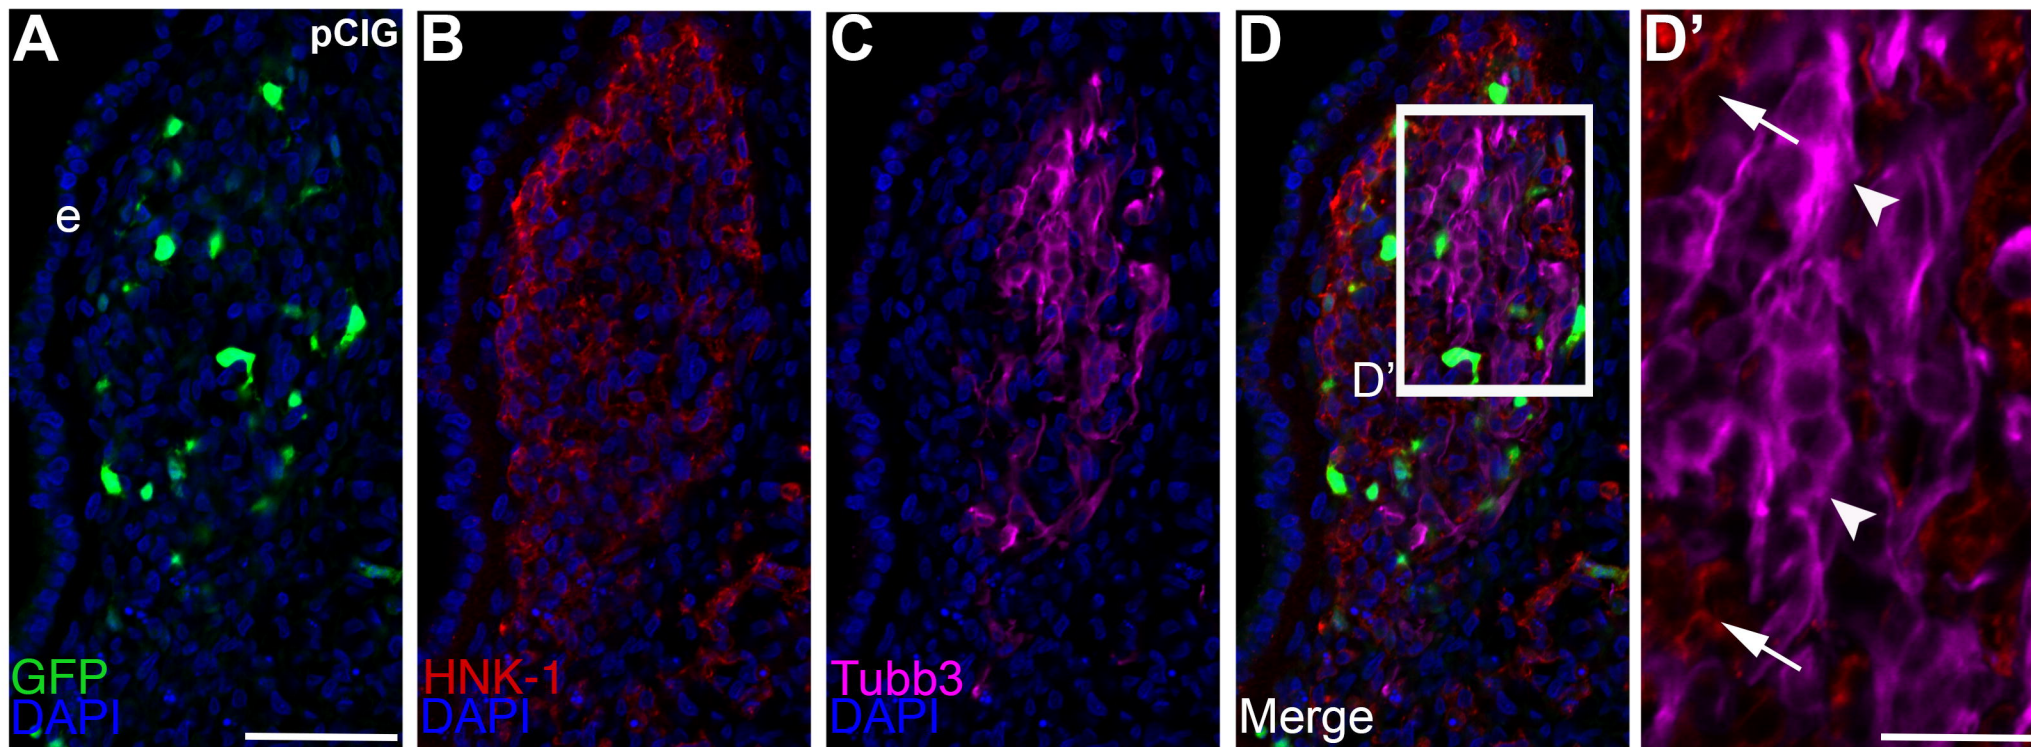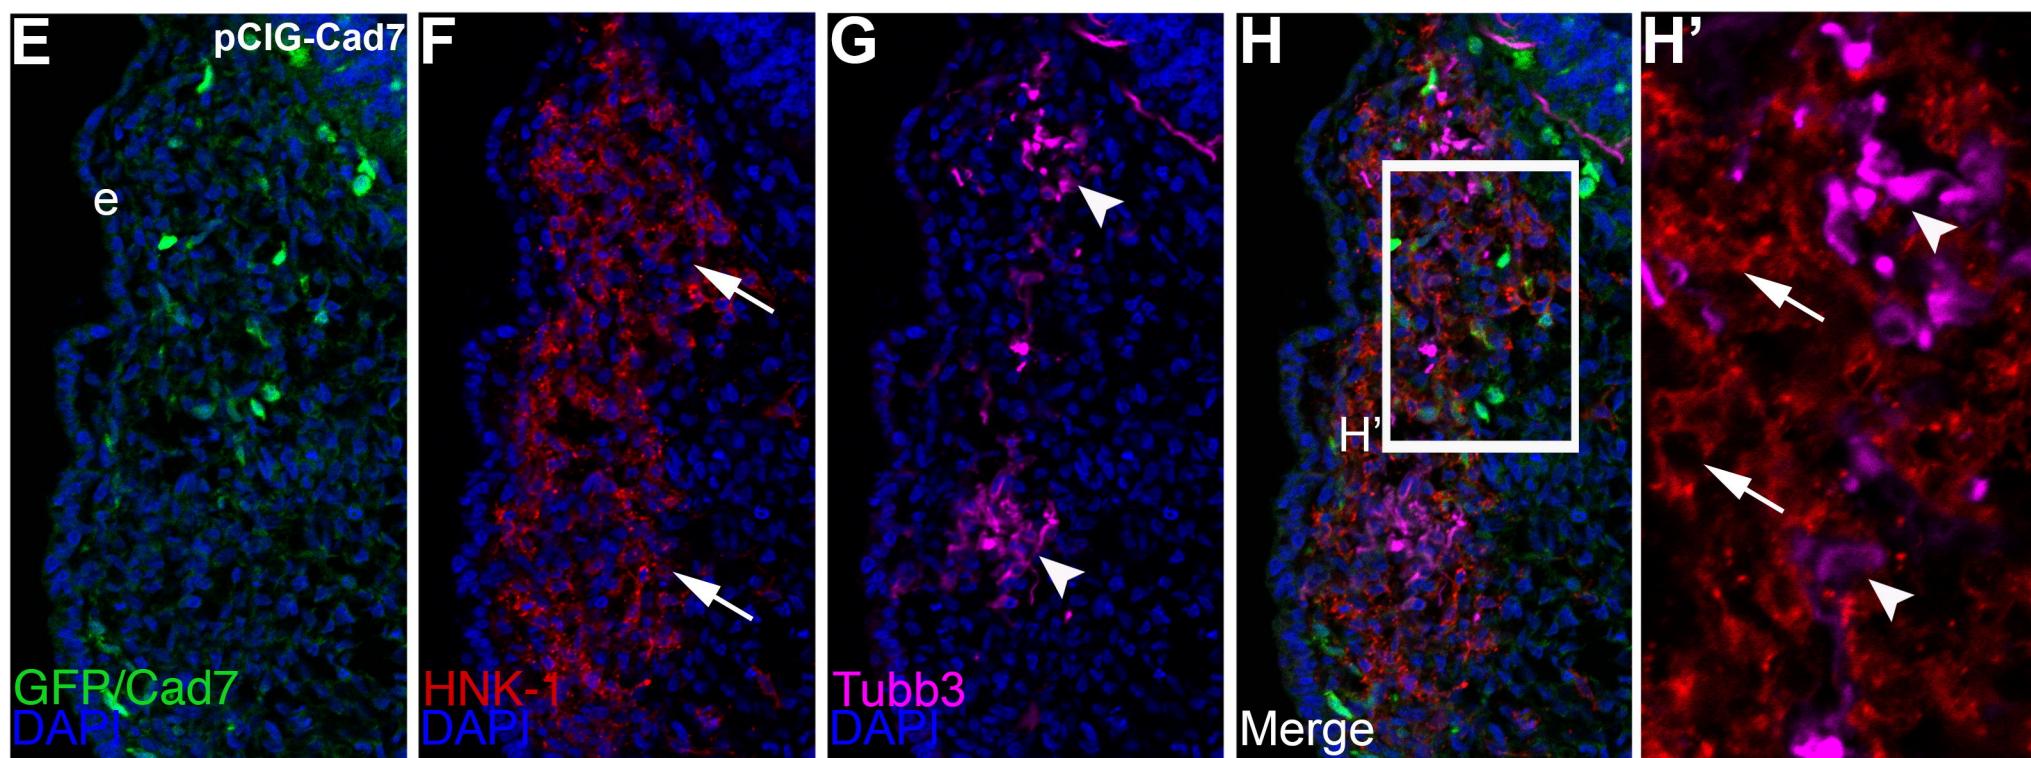



Figure 5

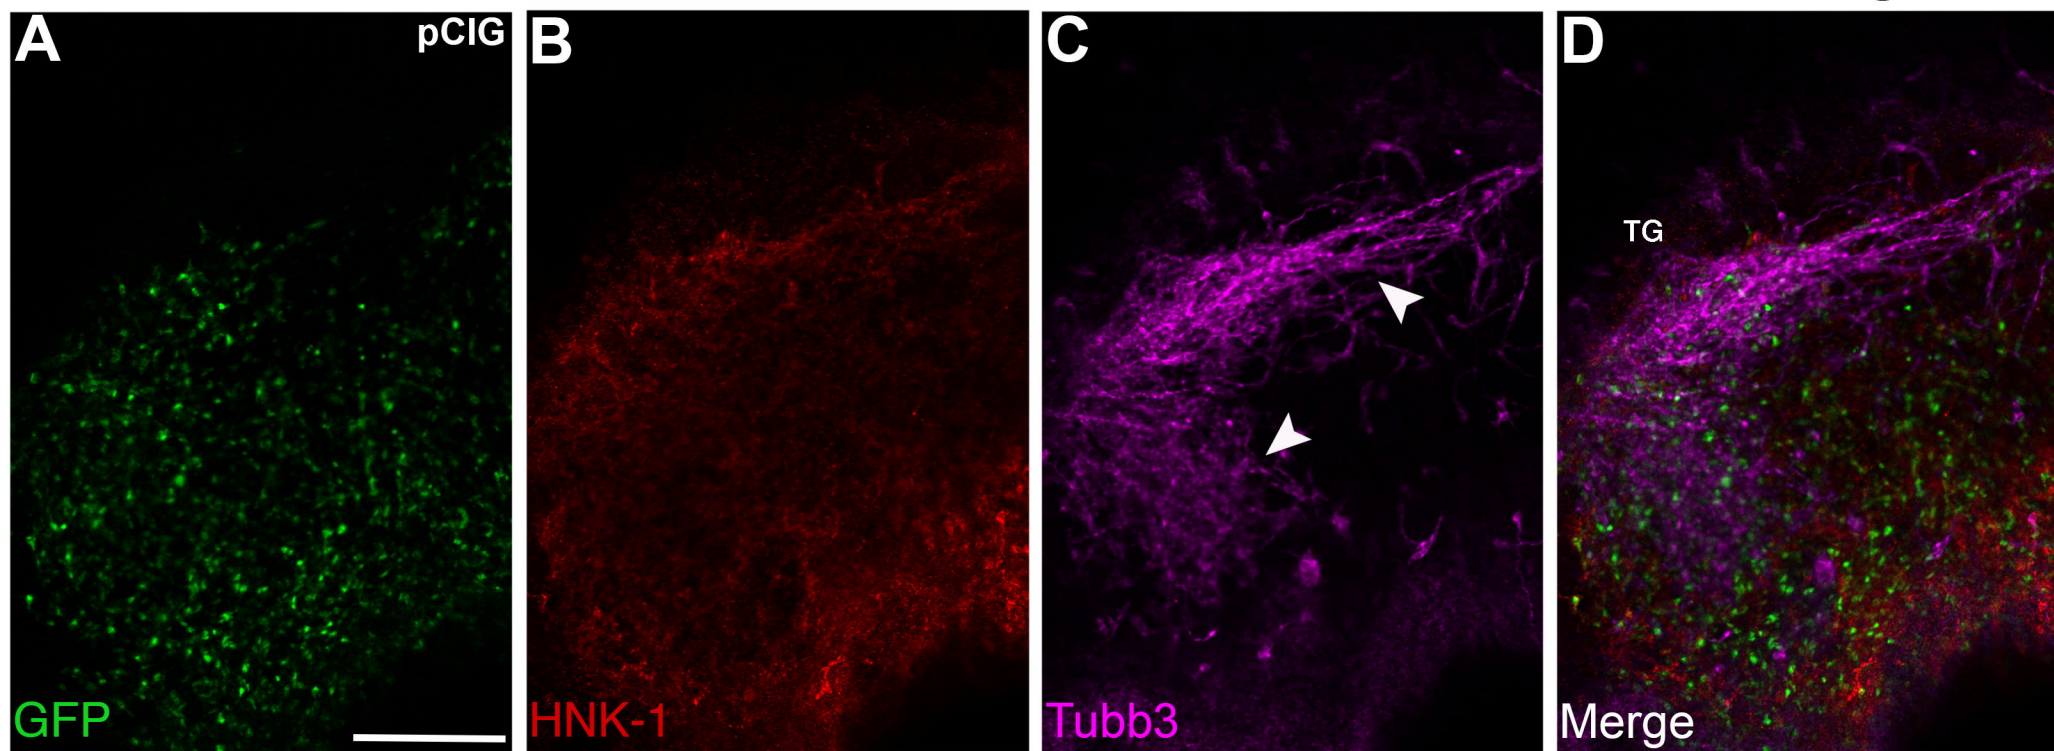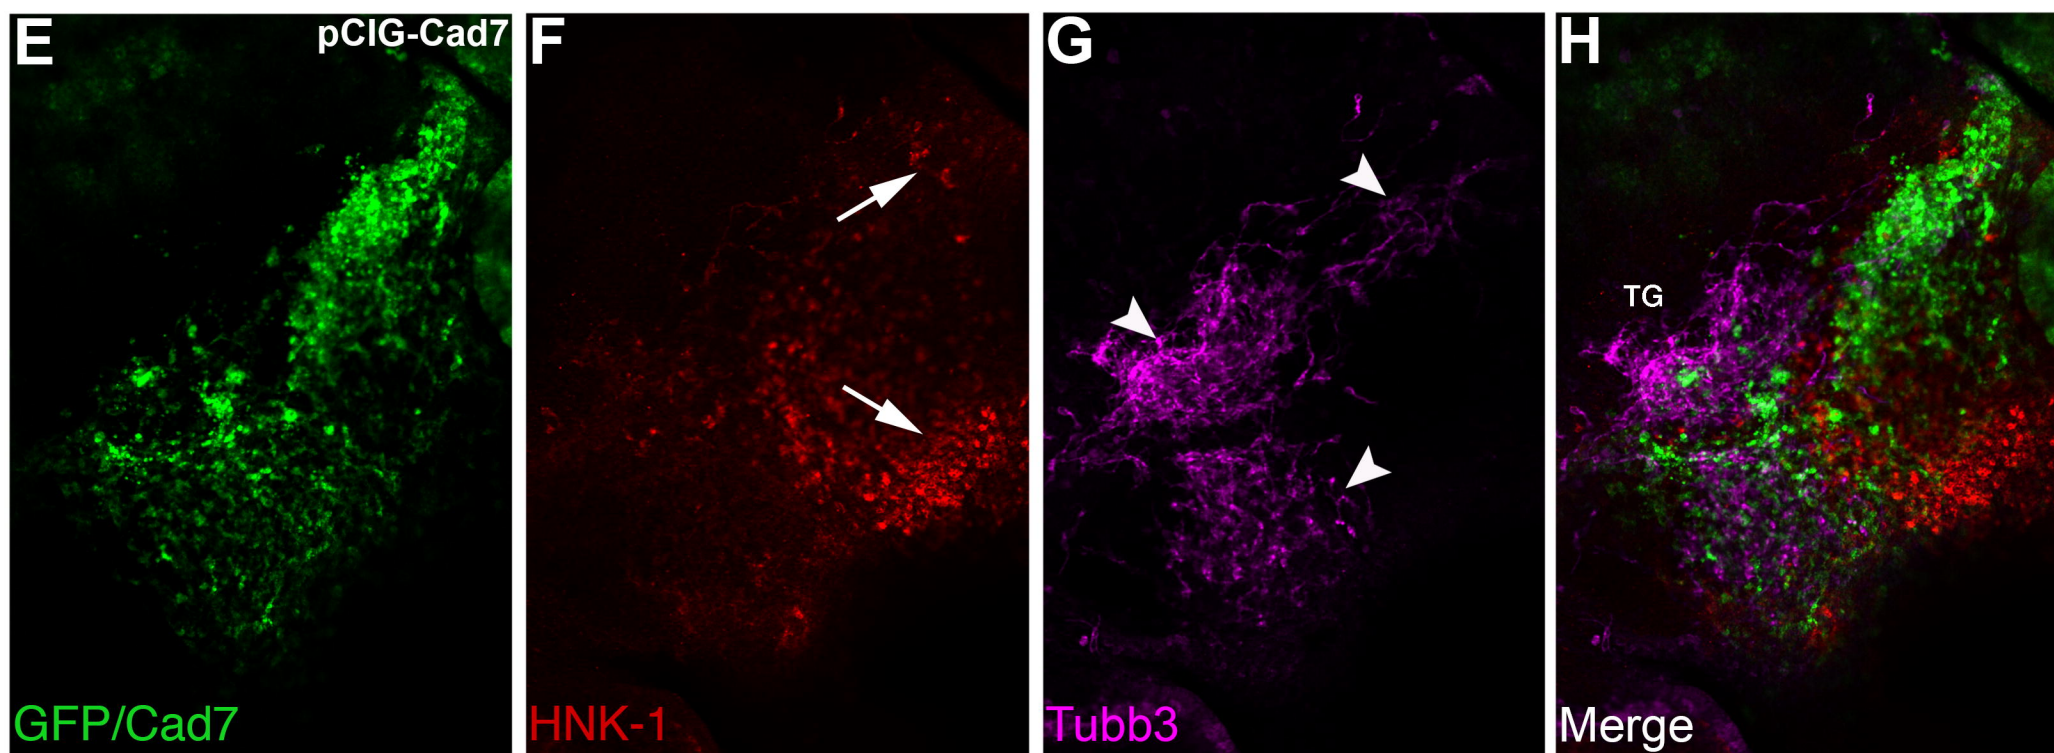

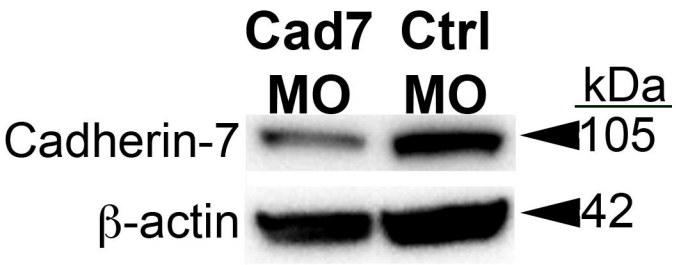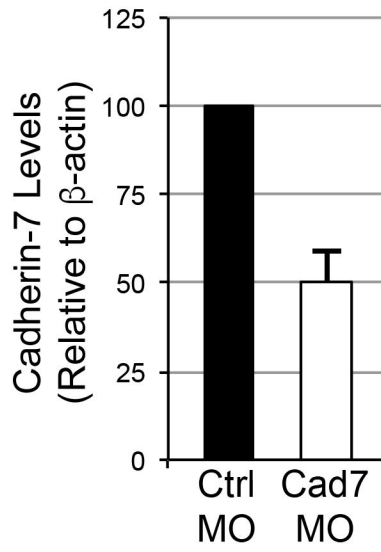



# Supplemental Figure 2

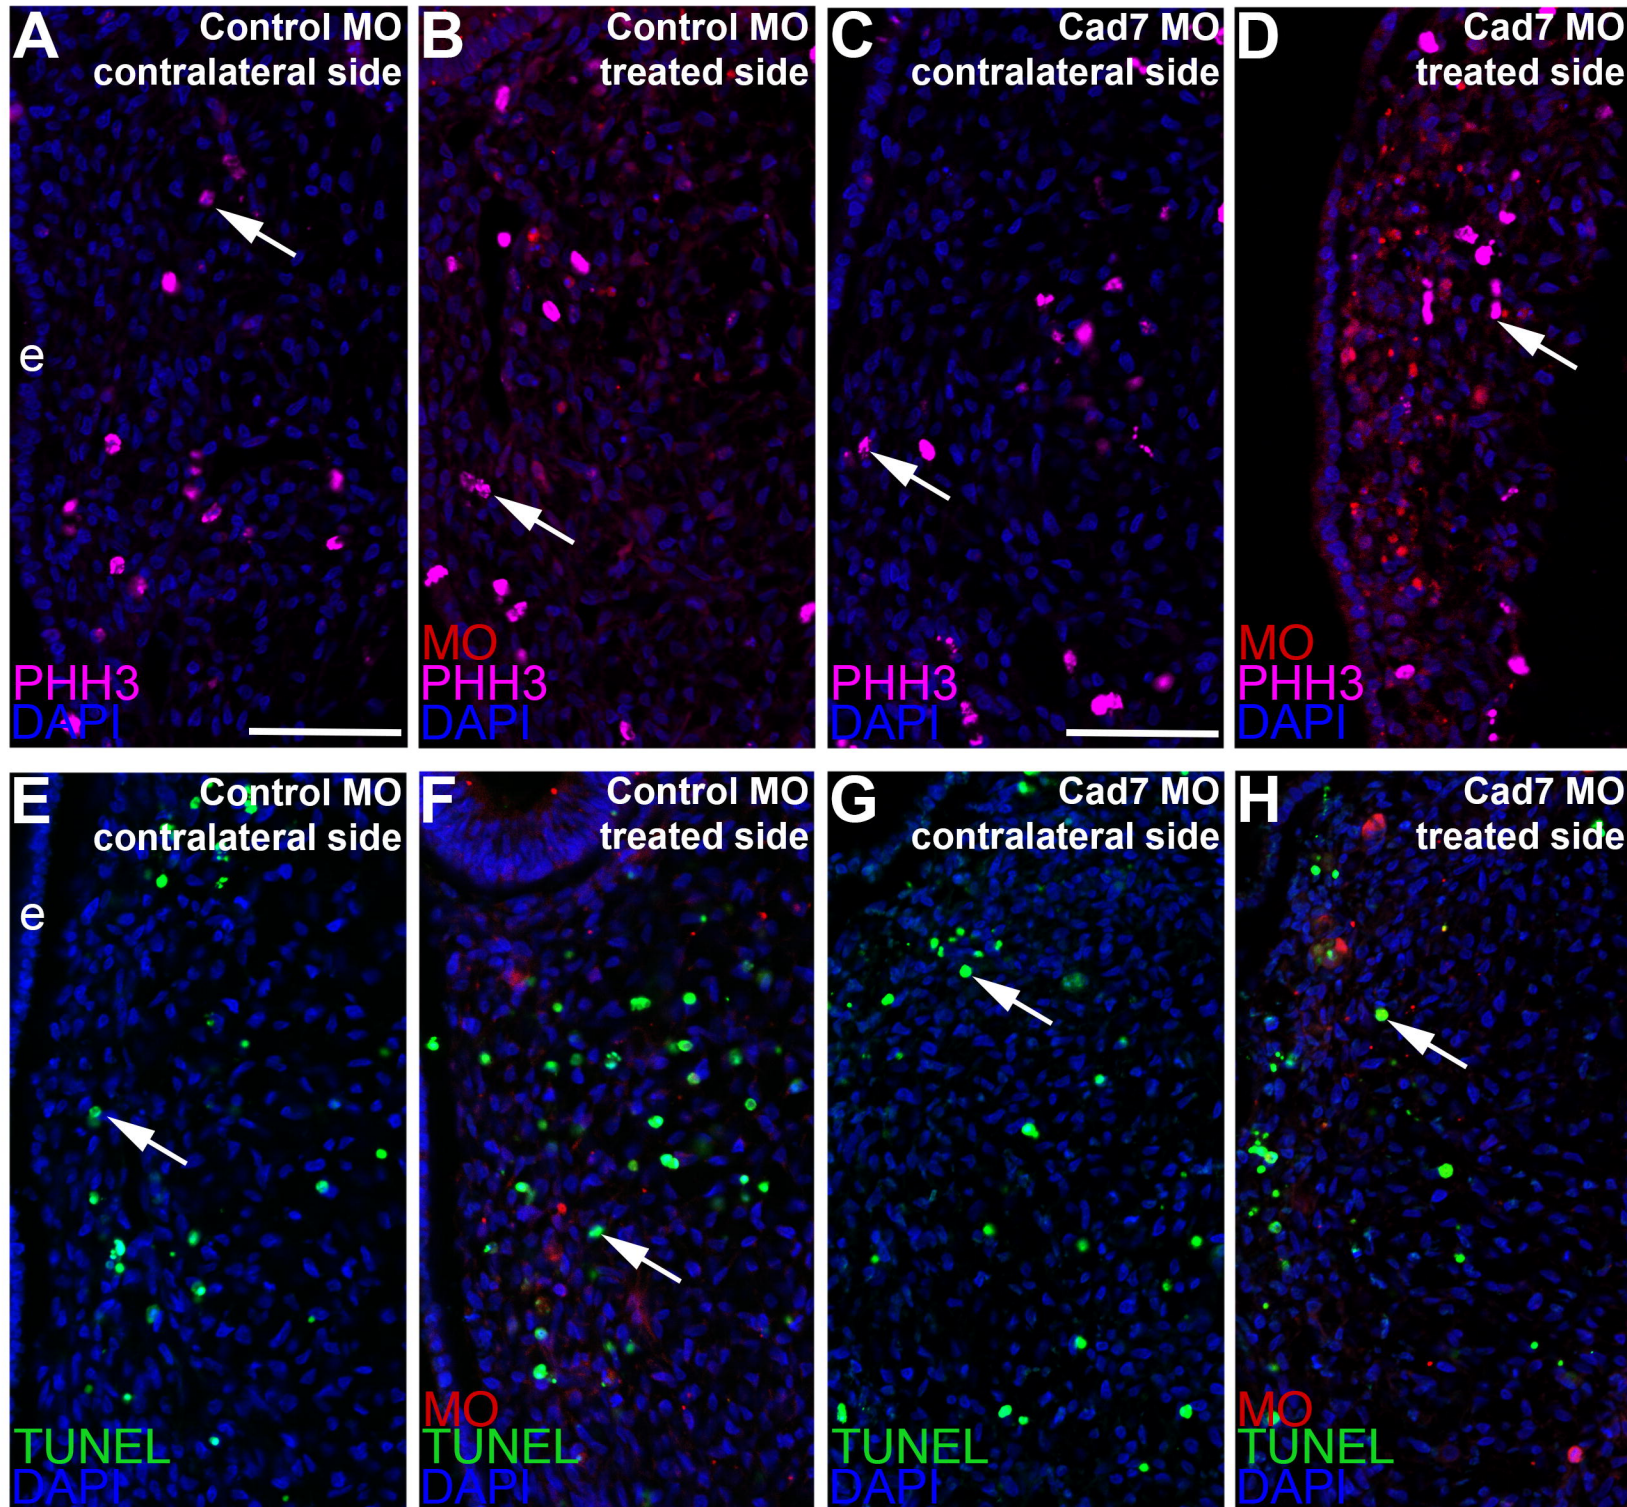

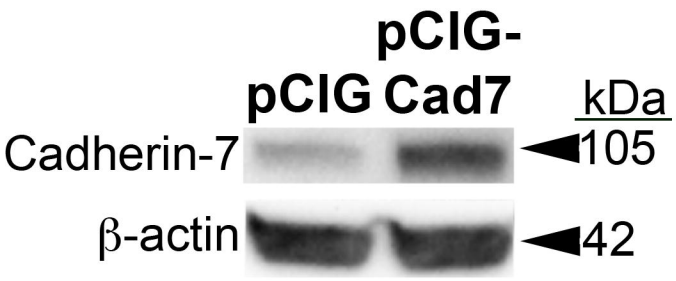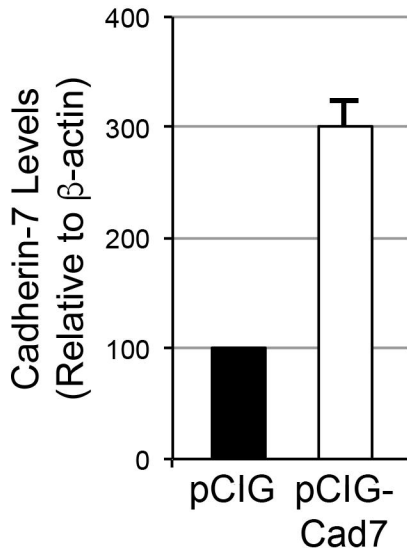



# Supplemental Figure 4

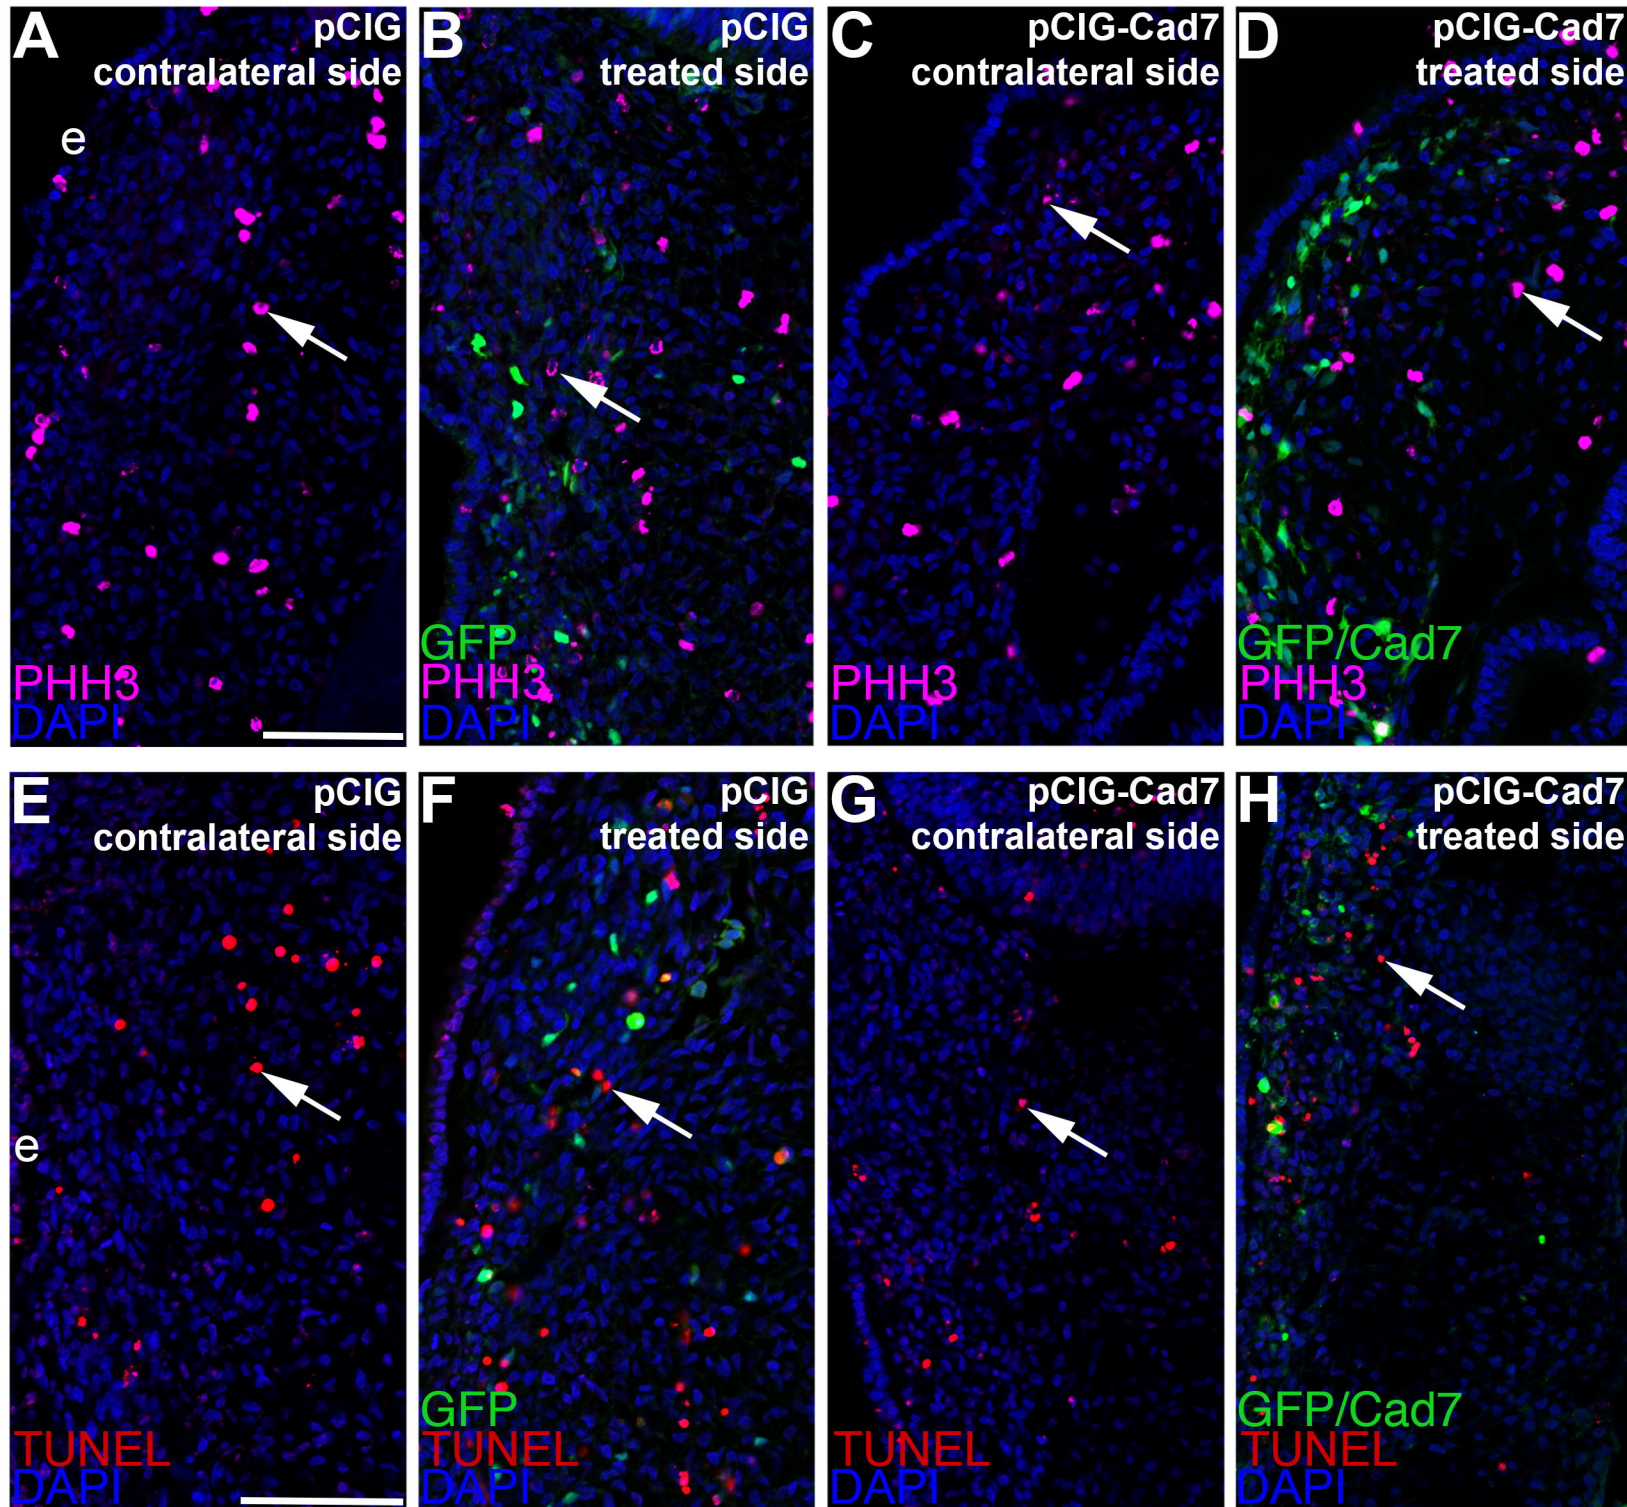

Source: https://www.biorxiv.org/content/10.1101/434613v1.full.pdf
